# Supplementary material for: Neutral nickel-catalyzed dehydrosulfonylation of unactivated allylic alcohols under mild conditions
Source: Royal Society of Chemistry journal article supplement (doi:10.1039/d3cc06036e), 2024-01-01
Supplement: d3cc06036e1.pdf [file d3cc06036e1.pdf]

## Supporting Information

### **A neutral nickel-catalyzed dehydrosulfonylation of unactivated allylic alcohols under mild conditions**

Yahui Yang,<sup>a</sup> Haibo Zhu,<sup>\*a</sup> Bozhen Gong,<sup>a</sup> Hong Yang,<sup>a</sup> Qiangwen Fan,<sup>\*a</sup> Zongbo Xie,<sup>\*a</sup> Zhang-Gao Le<sup>a</sup>

<sup>a</sup> *School of Chemistry and Materials Science, East China University of Technology, 330013,  
Nanchang, China.*

*E-mail: hbzhu@ecut.edu.cn, fanqw2019@ecut.edu.cn, zbxie@ecut.edu.cn*

### **Contents**

|                                                                         |    |
|-------------------------------------------------------------------------|----|
| 1. General .....                                                        | 2  |
| 2. Experimental sections .....                                          | 2  |
| 2.1 General procedures for Ni(II)-catalysed synthesis of sulfones. .... | 2  |
| 2.2 The synthesis of sulfonyl hydrazides .....                          | 2  |
| 2.2 Optimization of reaction conditions .....                           | 3  |
| 3. Data for the sulfone products .....                                  | 5  |
| 4. NMR spectra for compounds .....                                      | 15 |
| 5. References .....                                                     | 42 |

## 1. General

All commercial reagents were used directly without further purification, unless otherwise stated. Unless otherwise specified, all reactions were carried out in sealed Schlenk tubes under N<sub>2</sub> and then monitored by TLC. Products were purified by column chromatography on silica gel using petroleum ether and ethyl acetate as the eluent. Dimethyl sulfoxide (DMSO) was purchased from J & K chemical, stored over 4 Å molecular sieves and handled under N<sub>2</sub>. DMSO-*d*<sub>6</sub> and CDCl<sub>3</sub> were purchased from Shanghai aladdin Biochemical Technology Co., Ltd. All Schlenk tubes and sealed vessels (50 mL) were purchased from Beijing Synthware Glass. Chemical shifts for <sup>1</sup>H and <sup>13</sup>C NMR were referred to internal Me<sub>4</sub>Si (0 ppm) as the standard. The following abbreviations were used to describe NMR signals: s = singlet, d = doublet, t = triplet, m = multiplet, dd = doublet of doublets, q = quartet.

## 2. Experimental sections

### 2.1 General procedures for Ni(II)-catalysed synthesis of sulfones.

To a 50 mL Schlenk tube containing cinnamyl alcohol (**1a**) (0.2 mmol), 4-methylbenzenesulfonyl hydrazide (**2a**) (2.0 equiv.), Ni(acac)<sub>2</sub> (20 mol%), DPPF (20 mol%), and the tube was purged with N<sub>2</sub> for 3 times, followed by 2 mL of DMSO. The resulting mixture was stirred at 70 °C for 6 h. After cooling to room temperature, the mixture was partitioned between water (15 mL) and ethyl acetate (15 mL). The phases were separated and the aqueous phase extracted with further ethyl acetate (3 × 15 mL). The organic phases were dried over sodium sulfate. Filtration of the drying agent, and removal of all volatiles in vacuo gave a residue. Directly purified by flash chromatography to give the desired product **3a**.

### 2.2 The synthesis of sulfonyl hydrazides

Hydrazine monohydrochloride (6.0 mmol) and NaOH (6.6 mmol) was added to water (30 mL) and was cooled to 0 °C. A solution of arylsulfonyl chloride (3.0 mmol) in THF (10 mL) was added by dropwise at 0 °C. The mixture was further stirred at 0

°C for 30 min, followed by addition of EtOAc (20 mL). The mixture was extracted with water (3 × 10 mL). The combined organic extract was concentrated and concentrated by silica gel column chromatography to provide the desired product.<sup>1</sup>

## 2.2 Optimization of reaction conditions

**Table S1.** Nickel catalysts and additive screening<sup>a</sup>

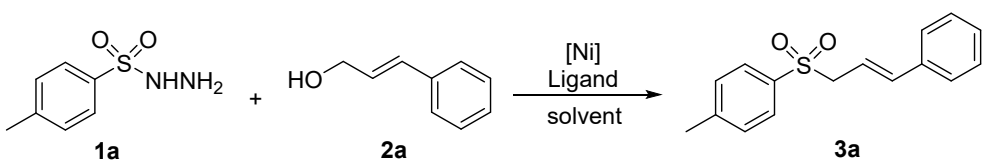

The reaction scheme shows the conversion of 1a (4-methylbenzenesulfonamide) and 2a (cinnamyl alcohol) to 3a (4-methylbenzenesulfonamide cinnamate) using a nickel catalyst, ligand, and solvent.

| Entry | Catalyst                             | Ligand                                | Solvent | Yield(%) <sup>b</sup> |
|-------|--------------------------------------|---------------------------------------|---------|-----------------------|
| 1     | NiCl <sub>2</sub>                    | DPPF                                  | DMF     | 11                    |
| 2     | NiBr <sub>2</sub>                    | DPPF                                  | DMF     | 13                    |
| 3     | Ni(OTf) <sub>2</sub>                 | DPPF                                  | DMF     | 0                     |
| 4     | Ni(acac) <sub>2</sub>                | DPPF                                  | DMF     | 60                    |
| 5     | Ni(OAc) <sub>2</sub>                 | DPPF                                  | DMF     | 29                    |
| 6     | Ni(PPh <sub>3</sub> )Cl <sub>2</sub> | DPPF                                  | DMF     | 0                     |
| 7     | Ni(acac) <sub>2</sub>                | -                                     | DMF     | 0                     |
| 8     | -                                    | DPPF                                  | DMF     | 0                     |
| 9     | Ni(acac) <sub>2</sub>                | DPPB                                  | DMF     | 48                    |
| 10    | Ni(acac) <sub>2</sub>                | DPEphos                               | DMF     | 16                    |
| 11    | Ni(acac) <sub>2</sub>                | BINAP                                 | DMF     | 43                    |
| 12    | Ni(acac) <sub>2</sub>                | Pcy <sub>3</sub>                      | DMF     | 0                     |
| 13    | Ni(acac) <sub>2</sub>                | PPh <sub>3</sub>                      | DMF     | 0                     |
| 14    | Ni(acac) <sub>2</sub>                | Xantphos                              | DMF     | trace                 |
| 15    | Ni(acac) <sub>2</sub>                | 1,10-Phenanthroline<br>monohydrate    | DMF     | 0                     |
| 16    | Ni(acac) <sub>2</sub>                | 1,10-Phenanthroline-5,6-<br>dione     | DMF     | 0                     |
| 17    | Ni(acac) <sub>2</sub>                | 4,7-Dimethoxy-1,10-<br>phenanthroline | DMF     | 0                     |
| 18    | Ni(acac) <sub>2</sub>                | DPPF                                  | DMSO    | 71                    |
| 19    | Ni(acac) <sub>2</sub>                | DPPF                                  | Dioxane | 55                    |
| 20    | Ni(acac) <sub>2</sub>                | DPPF                                  | DCE     | trace                 |
| 21    | Ni(acac) <sub>2</sub>                | DPPF                                  | MeCN    | 59                    |

|                 |                       |      |                  |       |
|-----------------|-----------------------|------|------------------|-------|
| 22              | Ni(acac) <sub>2</sub> | DPPF | EtOH             | trace |
| 23              | Ni(acac) <sub>2</sub> | DPPF | H <sub>2</sub> O | 0     |
| 24              | Ni(acac) <sub>2</sub> | DPPF | PhCl             | trace |
| 25              | Ni(acac) <sub>2</sub> | DPPF | toluene          | 59    |
| 26 <sup>c</sup> | Ni(acac) <sub>2</sub> | DPPF | DMSO             | 66    |
| 27 <sup>d</sup> | Ni(acac) <sub>2</sub> | DPPF | DMSO             | 74    |
| 28 <sup>e</sup> | Ni(acac) <sub>2</sub> | DPPF | DMSO             | 71    |
| 29 <sup>f</sup> | Ni(acac) <sub>2</sub> | DPPF | DMSO             | 75    |
| 30 <sup>g</sup> | Ni(acac) <sub>2</sub> | DPPF | DMSO             | 77    |

<sup>a</sup> Reaction conditions: **1a** (0.2 mmol), **2a** (0.4 mmol), [Ni] (10 mol%), Ligand (20 mol%), solvent (2 mL), 24 h, 80 °C, N<sub>2</sub>. <sup>b</sup> Isolated yields. <sup>c</sup> Reaction temperature: 60 °C. <sup>d</sup> Reaction temperature: 70 °C. <sup>e</sup> Reaction time and temperature: 2 h, 70 °C. <sup>f</sup> Reaction time and temperature: 6 h, 70 °C. <sup>g</sup> Reaction time and temperature: 12 h, 70 °C.

**Table S2.** Variation of time and molar ratio in optimization of reaction conditions<sup>a</sup>

Reaction scheme: **1a** + **2a**  $\xrightarrow[\text{DMSO, 70 °C, 6 h}]{\text{Ni(acac)}_2, \text{DPPF}}$  **3a**

| Entry | <b>1a</b><br>(mmol) | <b>2a</b><br>(mmol) | Ni(acac) <sub>2</sub><br>(mol%) | DPPF<br>(mol%) | Yield<br>(%) <sup>b</sup> |
|-------|---------------------|---------------------|---------------------------------|----------------|---------------------------|
| 1     | 0.3                 | 0.2                 | 10                              | 20             | 72                        |
| 2     | 0.2                 | 0.2                 | 10                              | 20             | 73                        |
| 3     | 0.2                 | 0.3                 | 10                              | 20             | 84                        |
| 4     | 0.2                 | 0.4                 | 10                              | 20             | 91                        |
| 5     | 0.2                 | 0.5                 | 10                              | 20             | 90                        |
| 6     | 0.2                 | 0.4                 | 5                               | 20             | 70                        |
| 7     | 0.2                 | 0.4                 | 20                              | 20             | 87                        |
| 8     | 0.2                 | 0.4                 | 10                              | 30             | 85                        |
| 9     | 0.2                 | 0.4                 | 10                              | 20             | 0 <sup>c</sup>            |

<sup>a</sup> Reaction conditions: cinnamyl alcohol **1a**, 4-methylbenzenesulfonyl hydrazide **2a**, Ni(acac)<sub>2</sub> and DPPF in DMSO (2 mL), 6 h, 70 °C, under N<sub>2</sub>. <sup>b</sup> Isolated yield. <sup>c</sup> Under air.

### 3. Data for the sulfone products

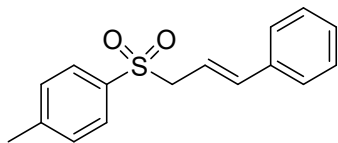

#### 1-(cinnamylsulfonyl)-4-methylbenzene<sup>2</sup>

(**3a**): white solid, mp: 118.6-120.2 °C. <sup>1</sup>H NMR (500 MHz, CDCl<sub>3</sub>) δ 7.75 (d, *J* = 8.1 Hz, 2H), 7.36 – 7.26 (m, 7H), 6.39 (d, *J* = 15.8 Hz, 1H), 6.16 – 6.03 (m, 1H), 3.93 (d, *J* = 7.6 Hz, 2H), 2.43 (s, 3H); <sup>13</sup>C NMR (101 MHz, CDCl<sub>3</sub>) δ 144.76, 139.02, 135.86, 135.59, 129.73, 128.66, 128.53, 128.49, 126.63, 115.37, 60.58, 21.64.

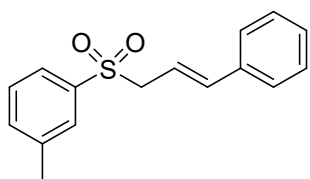

#### 1-(cinnamylsulfonyl)-3-methylbenzene<sup>2</sup>

(**3b**) white solid, mp: 95.5-96.4 °C. <sup>1</sup>H NMR (500 MHz, CDCl<sub>3</sub>) δ 7.70 – 7.65 (m, 2H), 7.45 – 7.39 (m, 2H), 7.33 – 7.27 (m, 5H), 6.38 (d, *J* = 15.9 Hz, 1H), 6.10 (dt, *J* = 15.6, 7.6 Hz, 1H), 3.94 (d, *J* = 8.3 Hz, 2H), 2.39 (s, 3H); <sup>13</sup>C NMR (126 MHz, CDCl<sub>3</sub>) δ 139.41, 139.22, 138.20, 135.81, 134.62, 129.00, 128.88, 128.69, 128.54, 126.64, 125.67, 115.20, 60.50, 21.31.

HRMS (ESI) calcd for C<sub>12</sub>H<sub>11</sub>NO<sub>3</sub>S (M + Na)<sup>+</sup> 295.07632, found 295.07669.

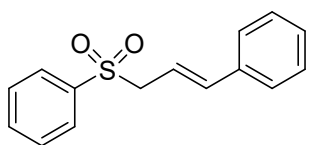

#### (cinnamylsulfonyl)benzene<sup>2</sup>

(**3c**) white solid, mp: 108.0-108.8 °C. <sup>1</sup>H NMR (500 MHz, CDCl<sub>3</sub>) δ 7.88 (d, *J* = 7.3 Hz, 2H), 7.65 (t, *J* = 7.5 Hz, 1H), 7.54 (t, *J* = 7.8 Hz, 2H), 7.33 – 7.27 (m, 5H), 6.37 (d, *J* = 15.8 Hz, 1H), 6.11 (dt, *J* = 15.6, 7.6 Hz, 1H), 3.96 (d, *J* = 7.6 Hz, 2H); <sup>13</sup>C NMR (126 MHz, CDCl<sub>3</sub>) δ 139.26, 138.32, 135.74, 133.85, 129.15, 128.71, 128.58, 128.56, 126.65, 115.10, 60.51.

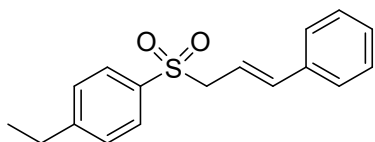

### 1-(cinnamylsulfonyl)-4-ethylbenzene<sup>2</sup>

(3d) white solid, mp: 118.0-109.2 °C. <sup>1</sup>H NMR (500 MHz, CDCl<sub>3</sub>) δ 7.78 (d, *J* = 8.5 Hz, 2H), 7.34 (d, *J* = 8.0 Hz, 2H), 7.30-7.26 (m, 5H), 6.38 (d, *J* = 16.0 Hz, 1H), 6.14-6.07 (m, 1H), 3.94 (d, *J* = 7.5 Hz, 2H), 2.72 (q, *J* = 7.5 Hz, 2H), 1.24 (t, *J* = 7.5 Hz, 3H).

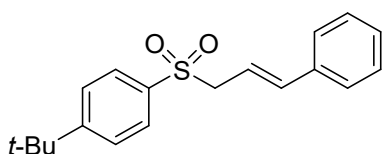

### 1-(tert-butyl)-4-(cinnamylsulfonyl)benzene<sup>3</sup>

(3e) white solid, mp: 120.3-122.1 °C. <sup>1</sup>H NMR (500 MHz, CDCl<sub>3</sub>) δ 7.79 (d, *J* = 8.4 Hz, 2H), 7.53 (d, *J* = 8.4 Hz, 2H), 7.32 – 7.26 (m, 5H), 6.38 (d, *J* = 15.9 Hz, 1H), 6.12 (dt, *J* = 15.5, 7.6 Hz, 1H), 3.94 (d, *J* = 7.6 Hz, 2H), 1.33 (s, 9H); <sup>13</sup>C NMR (126 MHz, CDCl<sub>3</sub>) δ 157.73, 139.16, 135.86, 135.44, 128.68, 128.50, 128.39, 126.65, 126.15, 115.27, 60.56, 35.30, 31.09.

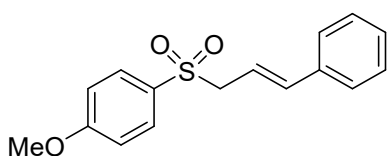

### 1-(cinnamylsulfonyl)-4-methoxybenzene<sup>2</sup>

(3f) white solid, mp: 119.2-120.6 °C. <sup>1</sup>H NMR (500 MHz, CDCl<sub>3</sub>) δ 7.79 (d, *J* = 8.9 Hz, 2H), 7.34 – 7.26 (m, 5H), 6.98 (d, *J* = 8.9 Hz, 2H), 6.38 (d, *J* = 15.8 Hz, 1H), 6.11 (dt, *J* = 15.6, 7.6 Hz, 1H), 3.93 (d, *J* = 7.6 Hz, 2H), 3.86 (s, 3H); <sup>13</sup>C NMR (126 MHz, CDCl<sub>3</sub>) δ 163.78, 138.97, 135.84, 130.72, 129.94, 128.70, 128.51, 126.65, 115.53, 114.29, 60.76, 55.72.

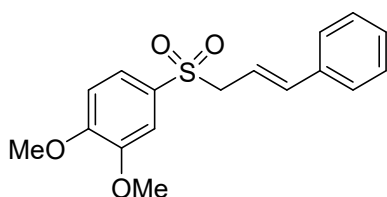

#### 4-(cinnamylsulfonyl)-1,2-dimethoxybenzene

(**3g**) white solid, mp: 123.3-125.3 °C. <sup>1</sup>H NMR (500 MHz, CDCl<sub>3</sub>) δ 7.50 (dd, *J* = 8.4, 1.9 Hz, 1H), 7.30 (s, 4H), 7.27 (d, *J* = 3.2 Hz, 2H), 6.96 (d, *J* = 8.5 Hz, 1H), 6.38 (d, *J* = 15.9 Hz, 1H), 6.13 (dt, *J* = 15.6, 7.6 Hz, 1H), 3.94 (d, *J* = 5.7 Hz, 5H), 3.80 (s, 3H); <sup>13</sup>C NMR (126 MHz, CDCl<sub>3</sub>) δ 153.37, 148.92, 139.01, 135.76, 129.91, 128.73, 128.57, 126.59, 122.63, 115.55, 110.82, 110.59, 60.76, 56.27, 56.16.

HRMS (ESI) calcd for C<sub>12</sub>H<sub>11</sub>NO<sub>3</sub>S (M + Na)<sup>+</sup> 341.08180, found 341.08254.

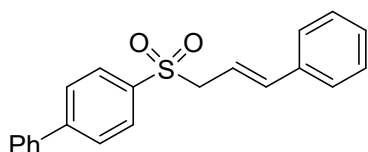

#### 4-(cinnamylsulfonyl)-1,1'-biphenyl<sup>3</sup>

(**3h**) white solid, mp: 123.2-125.2 °C. <sup>1</sup>H NMR (500 MHz, CDCl<sub>3</sub>) δ 7.93 (d, *J* = 8.4 Hz, 2H), 7.73 (d, *J* = 8.4 Hz, 2H), 7.60 (d, *J* = 7.4 Hz, 2H), 7.48 (t, *J* = 7.4 Hz, 2H), 7.42 (t, *J* = 7.3 Hz, 1H), 7.32 – 7.27 (m, 5H), 6.42 (d, *J* = 15.9 Hz, 1H), 6.14 (dt, *J* = 15.5, 7.6 Hz, 1H), 3.99 (d, *J* = 7.6 Hz, 2H); <sup>13</sup>C NMR (126 MHz, CDCl<sub>3</sub>) δ 146.71, 139.31, 139.10, 136.92, 135.77, 129.14, 129.11, 128.74, 128.73, 128.60, 127.72, 127.44, 126.68, 115.15, 60.63.

HRMS (ESI) calcd for C<sub>12</sub>H<sub>11</sub>NO<sub>3</sub>S (M + Na)<sup>+</sup> 357.09197, found 357.09271.

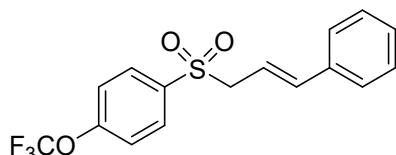

#### 1-(cinnamylsulfonyl)-4-(trifluoromethoxy)benzene<sup>3</sup>

(**3i**) white solid, mp: 112.3-113.8 °C. <sup>1</sup>H NMR (500 MHz, CDCl<sub>3</sub>) δ 7.93 (d, *J* = 8.5 Hz, 2H), 7.36 (d, *J* = 8.5 Hz, 2H), 7.32-7.26 (m, 5H), 6.37 (d, *J* = 16.0 Hz, 1H), 6.14-6.08 (m, 1H), 3.97 (d, *J* = 7.5 Hz, 2H).

<sup>19</sup>F NMR (471 MHz, CDCl<sub>3</sub>) δ -57.65.

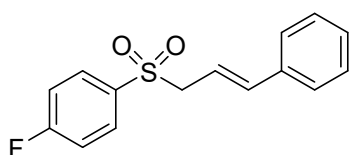

#### 1-(cinnamylsulfonyl)-4-fluorobenzene<sup>2</sup>

**(3j)** white solid, mp: 98.6-98.9 °C. <sup>1</sup>H NMR (500 MHz, CDCl<sub>3</sub>) δ 7.89 (dd, *J* = 8.8, 5.1 Hz, 2H), 7.30 (q, *J* = 7.2, 6.6 Hz, 5H), 7.21 (t, *J* = 8.5 Hz, 2H), 6.37 (d, *J* = 15.9 Hz, 1H), 6.11 (dt, *J* = 15.6, 7.6 Hz, 1H), 3.96 (d, *J* = 7.6 Hz, 2H); <sup>13</sup>C NMR (101 MHz, CDCl<sub>3</sub>) δ 165.66 (d, *J*<sub>C-F</sub> = 257.55 Hz), 139.42, 135.61, 134.41(d, *J*<sub>C-F</sub> = 3.03 Hz), 131.46 (d, *J*<sub>C-F</sub> = 10.1 Hz), 128.75, 128.69, 126.63, 116.44 (d, *J*<sub>C-F</sub> = 22.22 Hz), 114.98, 60.63.

<sup>19</sup>F NMR (471 MHz, DMSO) δ -101.88.

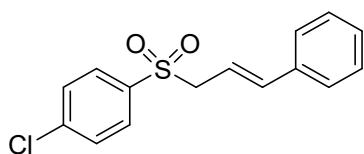

### 1-chloro-4-(cinnamylsulfonyl)benzene<sup>2</sup>

**(3k)** white solid, mp: 88.5-89.3 °C. <sup>1</sup>H NMR (500 MHz, CDCl<sub>3</sub>) δ 7.81 (d, *J* = 8.5 Hz, 2H), 7.51 (d, *J* = 8.5 Hz, 2H), 7.34-7.29 (m, 5H), 6.39 (d, *J* = 15.5 Hz, 1H), 6.13-6.07 (m, 1H), 3.95 (d, *J* = 7.5 Hz, 2H).

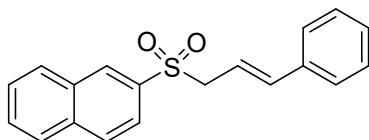

### 2-(cinnamylsulfonyl)naphthalene<sup>2</sup>

**(3l)** white solid, mp: 141.8-143.7 °C. <sup>1</sup>H NMR (500 MHz, CDCl<sub>3</sub>) δ 8.47 (s, 1H), 7.99 – 7.90 (m, 3H), 7.85 (dd, *J* = 8.6, 1.8 Hz, 1H), 7.70 – 7.64 (m, 1H), 7.63 – 7.59 (m, 1H), 7.29 – 7.24 (m, 5H), 6.40 (d, *J* = 15.8 Hz, 1H), 6.14 (dt, *J* = 15.5, 7.6 Hz, 1H), 4.03 (d, *J* = 7.6 Hz, 2H); <sup>13</sup>C NMR (126 MHz, CDCl<sub>3</sub>) δ 139.32, 135.74, 135.39, 135.36, 132.12, 130.41, 129.49, 129.36, 128.68, 128.55, 128.02, 127.73, 126.66, 123.20, 115.12, 60.61.

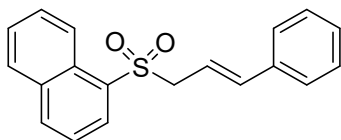

### 1-(cinnamylsulfonyl)naphthalene<sup>3</sup>

**(3m)** white solid, mp: 97.5-98.6 °C. <sup>1</sup>H NMR (500 MHz, CDCl<sub>3</sub>) δ 8.82 (d, *J* = 8.5 Hz, 1H), 8.25 (d, *J* = 7.5 Hz, 1H), 8.12 (d, *J* = 8.0 Hz, 1H), 7.99 (d, *J* = 8.0 Hz, 1H), 7.74-7.71 (m, 1H), 7.64 (t, *J* = 7.5 Hz, 1H), 7.56 (t, *J* = 8.0 Hz, 1H), 7.26-7.24 (m, 3H), 7.19-



7.17 (m, 2H), 6.27 (d,  $J = 16$  Hz, 1H), 6.08-6.02 (m, 1H), 4.16 (d,  $J = 7.5$  Hz, 2H).

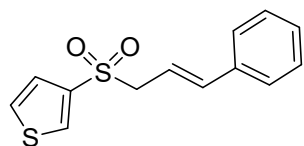

**3-(cinnamylsulfonyl)thiophene<sup>2</sup>**

(**3n**) white solid, mp: 91.3-92.6 °C. <sup>1</sup>H NMR (500 MHz, CDCl<sub>3</sub>) δ 8.05 – 8.01 (m, 1H), 7.43 (dd,  $J = 5.1, 3.1$  Hz, 1H), 7.37 – 7.35 (m, 1H), 7.33 – 7.27 (m, 5H), 6.41 (d,  $J = 15.9$  Hz, 1H), 6.14 (dt,  $J = 15.6, 7.6$  Hz, 1H), 3.97 (d,  $J = 7.6$  Hz, 2H). <sup>13</sup>C NMR (126 MHz, CDCl<sub>3</sub>) δ 139.32, 138.82, 135.72, 133.26, 128.75, 128.65, 128.12, 126.68, 126.42, 115.11, 60.72.

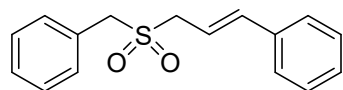

**(3-(benzylsulfonyl)prop-1-en-1-yl)benzene<sup>2</sup>**

(**3o**) white solid, mp: 115.8-117.1 °C. <sup>1</sup>H NMR (500 MHz, CDCl<sub>3</sub>) δ 7.42 (d,  $J = 6.0$  Hz, 7H), 7.34 (dt,  $J = 23.4, 7.1$  Hz, 3H), 6.63 (d,  $J = 15.9$  Hz, 1H), 6.23 (dt,  $J = 15.6, 7.5$  Hz, 1H), 4.25 (s, 2H), 3.75 (d,  $J = 7.5$  Hz, 2H); <sup>13</sup>C NMR (126 MHz, CDCl<sub>3</sub>) δ 139.27, 135.53, 130.82, 129.14, 129.11, 128.82, 127.75, 126.77, 115.20, 58.15, 55.82.

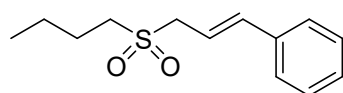

**(3-(butylsulfonyl)prop-1-en-1-yl)benzene**

(**3p**) white solid, mp: 78.5-79.4 °C. <sup>1</sup>H NMR (500 MHz, CDCl<sub>3</sub>) δ 7.44 – 7.39 (m, 2H), 7.35 (t,  $J = 7.4$  Hz, 2H), 7.30 (t,  $J = 7.2$  Hz, 1H), 6.70 (d,  $J = 15.9$  Hz, 1H), 6.26 (dt,  $J = 15.5, 7.6$  Hz, 1H), 3.86 (d,  $J = 7.6$  Hz, 2H), 3.03 – 2.94 (m, 2H), 1.83 (p,  $J = 7.7$  Hz, 2H), 1.45 (dt,  $J = 14.9, 7.5$  Hz, 2H), 0.95 (t,  $J = 7.4$  Hz, 3H).

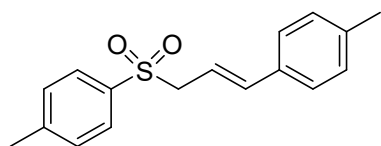

**1-methyl-4-((3-(p-tolyl)allyl)sulfonyl)benzene**

**(3p)** white solid, mp: 98.7-99.1 °C. <sup>1</sup>H NMR (500 MHz, CDCl<sub>3</sub>) δ 7.74 (d, *J* = 8.2 Hz, 2H), 7.31 (d, *J* = 8.1 Hz, 2H), 7.19 (d, *J* = 8.0 Hz, 2H), 7.11 (d, *J* = 7.9 Hz, 2H), 6.34 (d, *J* = 15.8 Hz, 1H), 6.04 (dt, *J* = 15.6, 7.6 Hz, 1H), 3.92 (d, *J* = 7.6 Hz, 2H), 2.43 (s, 3H), 2.33 (s, 3H); <sup>13</sup>C NMR (126 MHz, CDCl<sub>3</sub>) δ 144.74, 138.94, 138.52, 135.48, 133.09, 129.73, 129.38, 128.56, 126.57, 114.20, 60.64, 21.69, 21.30.

HRMS (ESI) calcd for C<sub>12</sub>H<sub>11</sub>NO<sub>3</sub>S (M + Na)<sup>+</sup> 309.09197, found 309.09265.

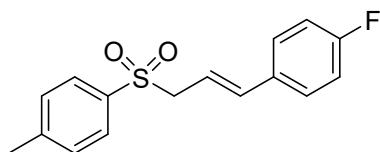

**1-fluoro-4-(3-tosylprop-1-en-1-yl)benzene<sup>2</sup>**

**(3q)** white solid, mp: 143.2-144.6 °C. <sup>1</sup>H NMR (500 MHz, CDCl<sub>3</sub>) δ 7.75 (d, *J* = 8.1 Hz, 2H), 7.33 (d, *J* = 8.0 Hz, 2H), 7.27 (t, *J* = 7.0 Hz, 2H), 7.00 (t, *J* = 8.6 Hz, 2H), 6.37 (d, *J* = 15.8 Hz, 1H), 6.02 (dt, *J* = 15.5, 7.6 Hz, 1H), 3.92 (d, *J* = 7.6 Hz, 2H), 2.44 (s, 3H); <sup>13</sup>C NMR (101 MHz, CDCl<sub>3</sub>) δ 162.81 (d, *J*<sub>C-F</sub> = 249.47 Hz), 144.83, 137.83, 135.59, 132.05 (d, *J*<sub>C-F</sub> = 3.03 Hz), 129.77, 128.49, 128.27 (d, *J*<sub>C-F</sub> = 8.08 Hz), 115.66 (d, *J*<sub>C-F</sub> = 21.21 Hz), 115.04 (d, *J*<sub>C-F</sub> = 1.01 Hz), 60.48, 21.66. <sup>19</sup>F NMR (471 MHz, DMSO) δ -112.77.

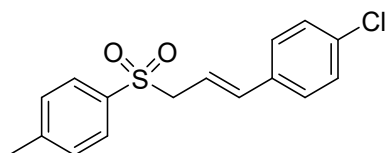

**1-chloro-4-(3-tosylprop-1-en-1-yl)benzene<sup>2</sup>**

**(3r)** white solid, mp: 141.1-142.1 °C. <sup>1</sup>H NMR (400 MHz, CDCl<sub>3</sub>) δ 7.75 (d, *J* = 6.1 Hz, 2H), 7.32 (d, *J* = 7.7 Hz, 2H), 7.30 – 7.26 (m, 2H), 7.24 – 7.18 (m, 2H), 6.35 (d, *J* = 15.7 Hz, 1H), 6.08 (ddt, *J* = 15.6, 7.5, 3.8 Hz, 1H), 3.92 (d, *J* = 7.3 Hz, 2H), 2.43 (s, 3H); <sup>13</sup>C NMR (101 MHz, CDCl<sub>3</sub>) δ 144.89, 137.76, 135.54, 134.31, 134.24, 129.79, 128.88, 128.48, 127.83, 116.03, 60.45, 21.67.

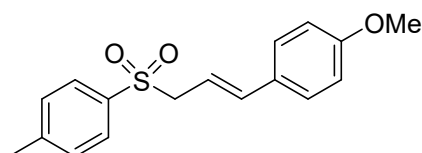

### 1-methoxy-4-(3-tosylprop-1-en-1-yl)benzene<sup>2</sup>

(3s) white solid, mp: 118.4-118.9 °C. <sup>1</sup>H NMR (400 MHz, CDCl<sub>3</sub>) δ 7.74 (d, *J* = 7.9 Hz, 2H), 7.31 (d, *J* = 7.9 Hz, 2H), 7.23 (d, *J* = 8.4 Hz, 2H), 6.83 (d, *J* = 8.4 Hz, 2H), 6.32 (d, *J* = 15.8 Hz, 1H), 5.94 (dt, *J* = 15.6, 7.6 Hz, 1H), 3.90 (d, *J* = 7.6 Hz, 2H), 3.79 (s, 3H), 2.42 (s, 3H); <sup>13</sup>C NMR (101 MHz, CDCl<sub>3</sub>) δ 159.88, 144.69, 138.51, 135.62, 129.70, 128.66, 128.53, 127.93, 114.06, 112.82, 60.66, 55.30, 21.64.

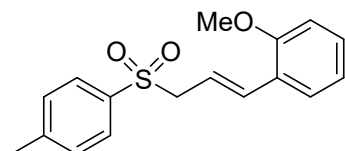

### 1-methoxy-2-(3-tosylprop-1-en-1-yl)benzene<sup>2</sup>

(3t) white solid, mp: 109.3-110.8 °C. <sup>1</sup>H NMR (500 MHz, CDCl<sub>3</sub>) δ 7.76 (d, *J* = 8.1 Hz, 2H), 7.32 (t, *J* = 7.1 Hz, 3H), 7.27 – 7.22 (m, 1H), 6.91 (t, *J* = 7.5 Hz, 1H), 6.84 (d, *J* = 8.3 Hz, 1H), 6.69 (d, *J* = 15.9 Hz, 1H), 6.12 (dt, *J* = 15.8, 7.6 Hz, 1H), 3.95 (d, *J* = 7.6 Hz, 2H), 3.78 (s, 3H), 2.43 (s, 3H); <sup>13</sup>C NMR (126 MHz, CDCl<sub>3</sub>) δ 156.85, 144.62, 135.59, 134.18, 129.69, 129.58, 128.57, 127.29, 124.92, 120.68, 115.90, 110.90, 61.12, 55.41, 21.68.

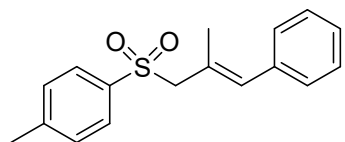

### 1-methyl-4-((2-methyl-3-phenylallyl)sulfonyl)benzene

(3u) colorless liquid. <sup>1</sup>H NMR (500 MHz, CDCl<sub>3</sub>) δ 7.77 (d, *J* = 8.1 Hz, 2H), 7.32 (dd, *J* = 15.4, 7.9 Hz, 4H), 7.23 (t, *J* = 7.4 Hz, 1H), 7.08 (d, *J* = 7.5 Hz, 2H), 6.07 (s, 1H), 3.88 (s, 2H), 2.44 (s, 3H), 1.97 (s, 3H); <sup>13</sup>C NMR (126 MHz, CDCl<sub>3</sub>) δ 144.74, 136.64, 135.34, 134.74, 129.70, 128.74, 128.66, 128.22, 127.17, 126.28, 67.12, 21.71, 18.64.

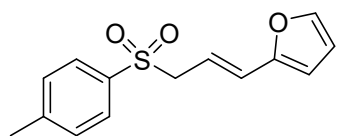

### 2-(3-tosylprop-1-en-1-yl)furan<sup>2</sup>

(3v) white solid, mp: 85.7-87.1 °C. <sup>1</sup>H NMR (500 MHz, CDCl<sub>3</sub>) δ 7.76 (d, *J* = 8.2 Hz,

2H), 7.37 – 7.30 (m, 3H), 6.36 (dd,  $J = 3.3, 1.8$  Hz, 1H), 6.24 (dd,  $J = 9.5, 6.2$  Hz, 2H), 6.00 (dt,  $J = 15.6, 7.8$  Hz, 1H), 3.90 (d,  $J = 7.7$  Hz, 2H), 2.44 (s, 3H);  $^{13}\text{C}$  NMR (101 MHz,  $\text{CDCl}_3$ )  $\delta$  151.47, 144.77, 142.82, 135.64, 129.76, 128.52, 126.70, 113.49, 111.43, 109.65, 60.41, 21.66.

HRMS (ESI) calcd for  $\text{C}_{12}\text{H}_{11}\text{NO}_3\text{S}$  ( $\text{M} + \text{Na}$ ) $^+$  285.05559, found 285.05515.

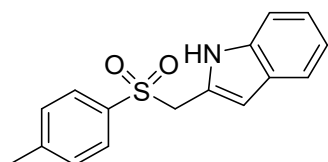

### 2-(tosylmethyl)-1H-indole

(3w) White solid, mp: 157.4-159.4 °C.  $^1\text{H}$  NMR (400 MHz, DMSO)  $\delta$  11.15 (s, 1H), 7.62 (d,  $J = 8.2$  Hz, 2H), 7.46 (d,  $J = 7.9$  Hz, 1H), 7.35 (dd,  $J = 8.0, 4.2$  Hz, 3H), 7.12 – 7.05 (m, 2H), 6.95 (t,  $J = 7.4$  Hz, 1H), 4.73 (s, 2H), 2.37 (s, 3H);  $^{13}\text{C}$  NMR (101 MHz, DMSO)  $\delta$  144.35, 136.49, 136.32, 129.92, 128.50, 127.59, 127.42, 121.73, 119.42, 119.35, 111.94, 101.97, 53.72, 21.50.

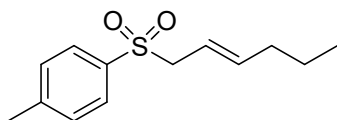

### 1-(hex-2-en-1-ylsulfonyl)-4-methylbenzene<sup>3</sup>

(3x) White solid, mp: 87.5-88.9 °C.  $^1\text{H}$  NMR (500 MHz,  $\text{CDCl}_3$ )  $\delta$  7.74 (dd,  $J = 14.9, 8.2$  Hz, 2H), 7.33 (d,  $J = 7.9$  Hz, 2H), 5.51 (dt,  $J = 13.8, 6.7$  Hz, 1H), 5.39 (dt,  $J = 15.1, 7.3$  Hz, 1H), 3.73 (d,  $J = 7.3$  Hz, 2H), 2.44 (s, 3H), 1.97 (q,  $J = 7.1$  Hz, 2H), 1.34-1.25 (m, 2H), 0.82 (t,  $J = 7.4$  Hz, 2H);  $^{13}\text{C}$  NMR (126 MHz,  $\text{CDCl}_3$ )  $\delta$  144.55, 141.48, 135.43, 129.59, 128.53, 116.18, 60.24, 34.56, 21.88, 21.65, 13.53.

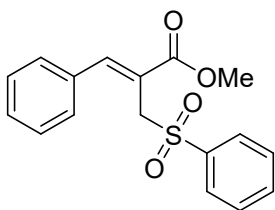

### methyl (Z)-3-phenyl-2-((phenylsulfonyl)methyl)acrylate<sup>4</sup>

(5a) White solid, mp: 59.4-60.2 °C.  $^1\text{H}$  NMR (500 MHz,  $\text{CDCl}_3$ )  $\delta$  7.96 (s, 1H), 7.86

(d,  $J = 8.0$  Hz, 2H), 7.63-7.60 (m, 1H), 7.52-7.48 (m, 4H), 7.39-7.37 (m, 3H), 4.50 (s, 2H), 3.59 (s, 3H).

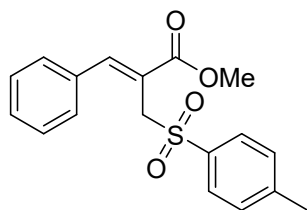

**methyl (Z)-3-phenyl-2-(tosylmethyl)acrylate<sup>4</sup>**

(5b) White solid, mp: 120.4-121.6 °C. <sup>1</sup>H NMR (500 MHz, CDCl<sub>3</sub>) δ 7.93 (s, 1H), 7.71 (d,  $J = 7.5$  Hz, 2H), 7.47 (s, 2H), 7.37-7.36 (m, 3H), 7.27-7.26 (d,  $J = 5$  Hz, 2H), 4.48 (s, 2H), 3.61 (s, 3H), 2.42 (s, 3H). <sup>13</sup>C NMR (126 MHz, CDCl<sub>3</sub>) δ 166.90, 146.14, 144.70, 136.14, 133.57, 129.57, 129.12, 128.64, 128.48, 120.93, 55.03, 52.34, 21.57.

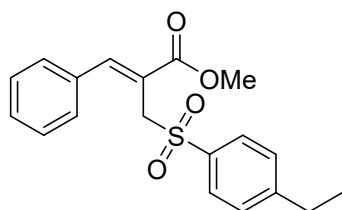

**methyl (Z)-2-(((4-ethylphenyl)sulfonyl)methyl)-3-phenylacrylate<sup>4</sup>**

(5c) White solid, mp: 112.1-113.4 °C. <sup>1</sup>H NMR (500 MHz, CDCl<sub>3</sub>) δ 7.93 (s, 1H), 7.75 (d,  $J = 8.5$  Hz, 2H), 7.48-7.46 (m, 2H), 7.37-7.36 (m, 3H), 7.31-7.30 (m, 2H), 4.48 (s, 2H), 3.59 (s, 3H), 2.74-2.69 (m, 2H), 1.26 (t,  $J = 5.0$  Hz, 3H).

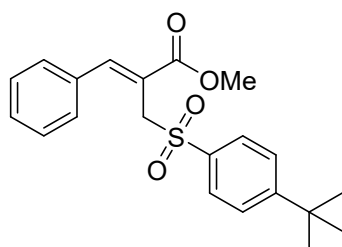

**methyl (Z)-2-(((4-(tert-butyl)phenyl)sulfonyl)methyl)-3-phenylacrylate<sup>4</sup>**

(5d) White solid, mp: 99.5-100.2 °C. <sup>1</sup>H NMR (500 MHz, CDCl<sub>3</sub>) δ 7.93 (s, 1H), 7.77 (d,  $J = 8.5$  Hz, 2H), 7.51-7.46 (m, 4H), 7.37-7.36 (m, 3H), 4.48 (s, 2H), 3.58 (s, 3H), 1.34 (s, 9H).

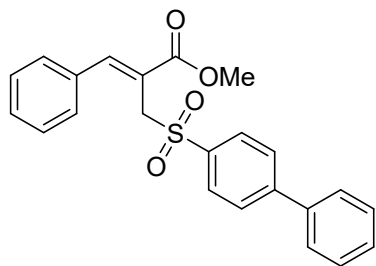

**methyl (*Z*)-2-(((1,1'-biphenyl)-4-ylsulfonyl)methyl)-3-phenylacrylate<sup>4</sup>**

(**5e**) Light yellow solid, mp: 135.2-136.7 °C. <sup>1</sup>H NMR (500 MHz, CDCl<sub>3</sub>) δ 7.95 (s, 1H), 7.87 (d, *J* = 8.0 Hz, 2H), 7.66 (d, *J* = 8.0 Hz, 2H), 7.59 (d, *J* = 7.0 Hz, 2H), 7.50 (t, *J* = 7.0 Hz, 2H), 7.45-7.43 (m, 3H), 7.35-7.34 (m, 3H), 4.55 (s, 2H), 3.62 (s, 3H).

## 4. NMR spectra for compounds

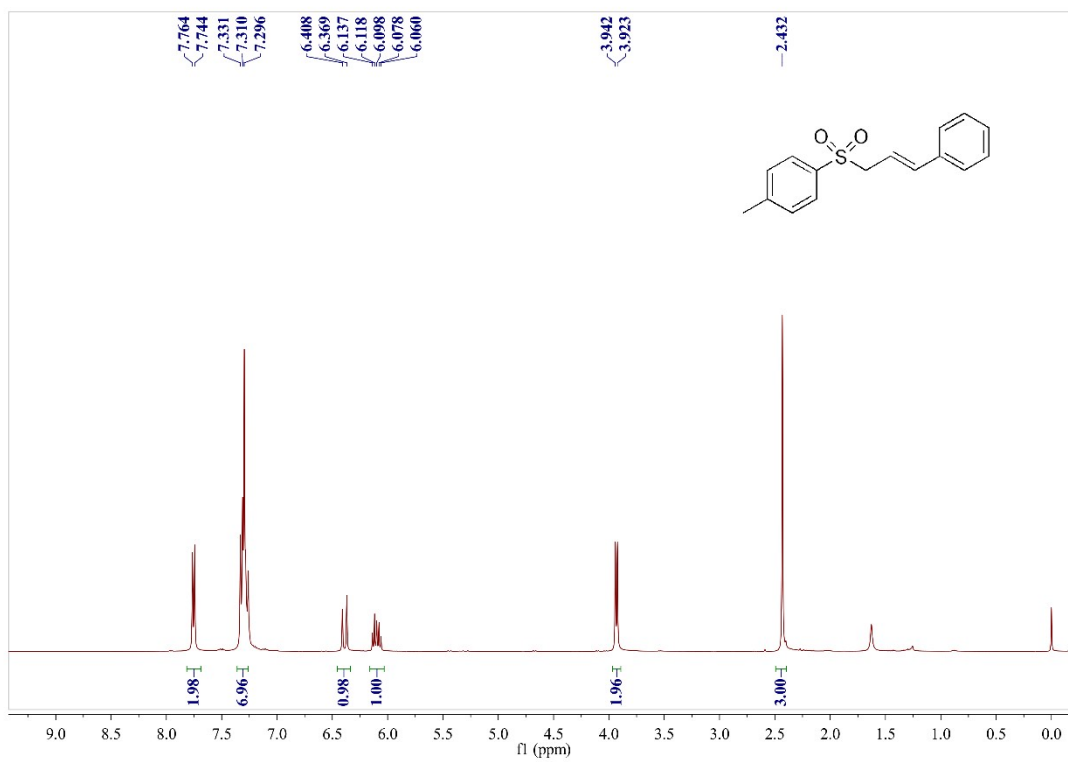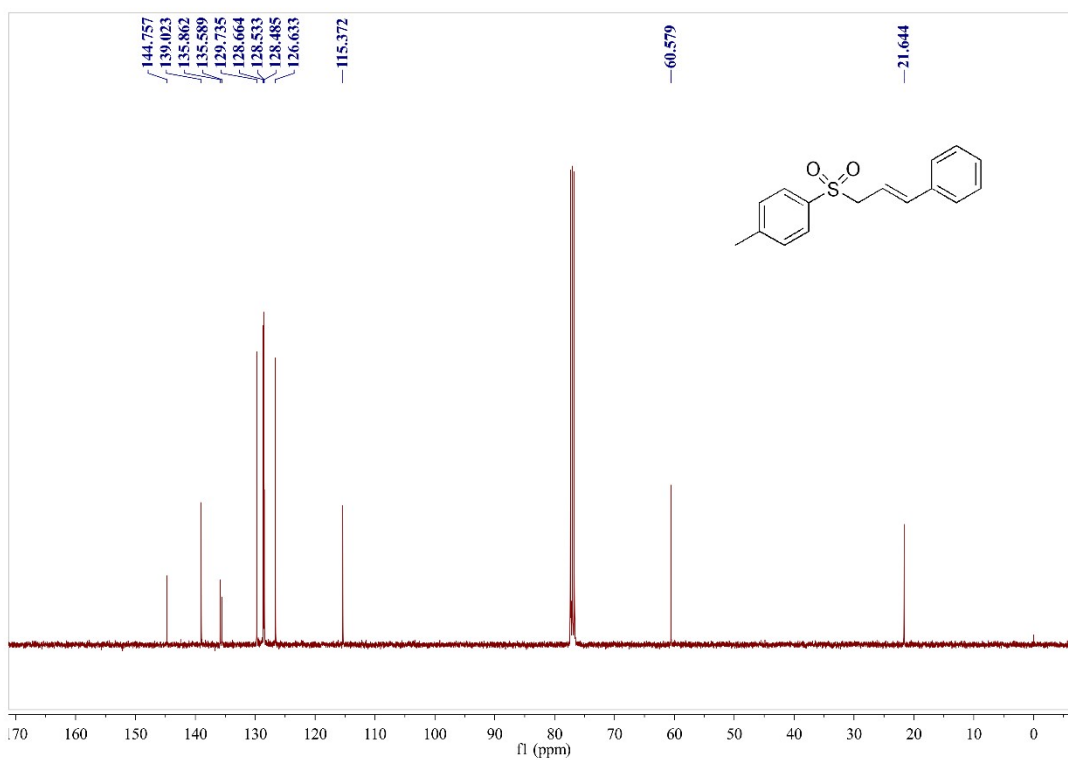

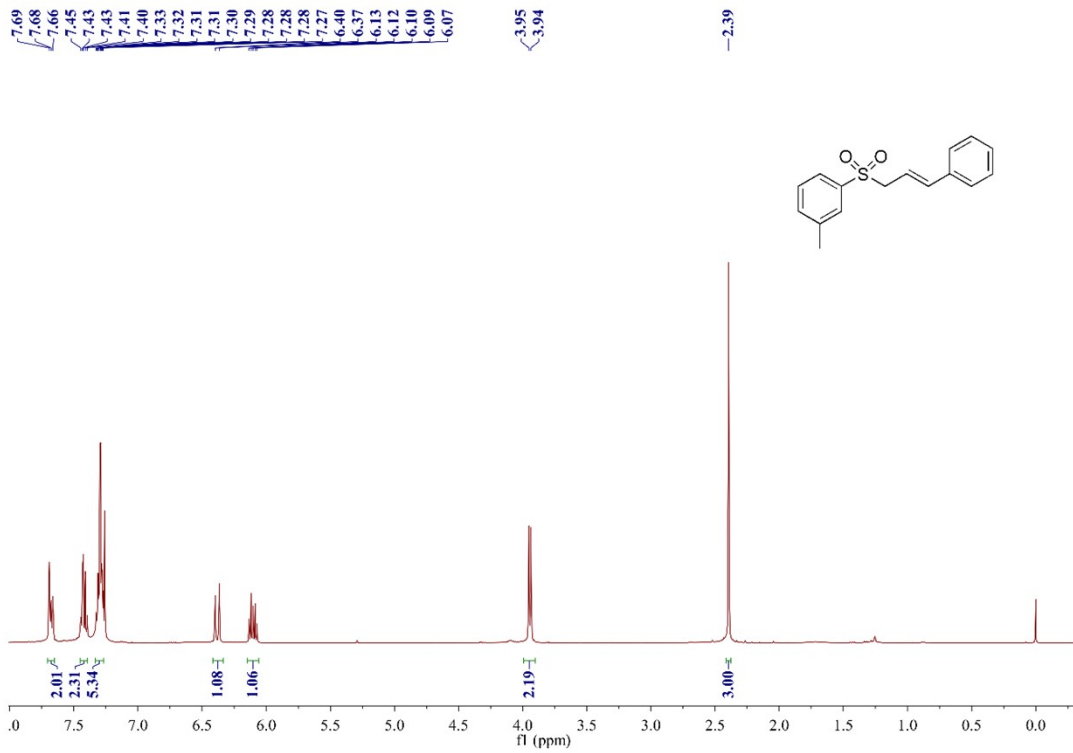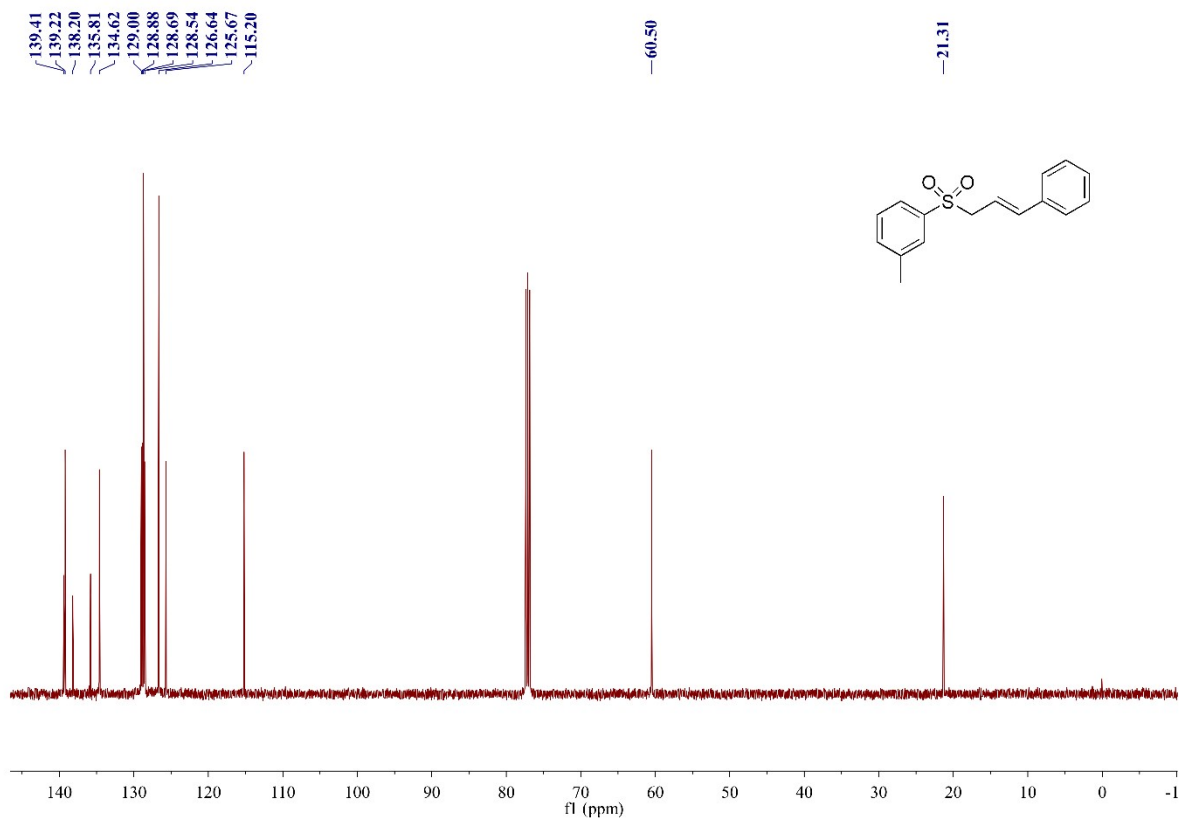



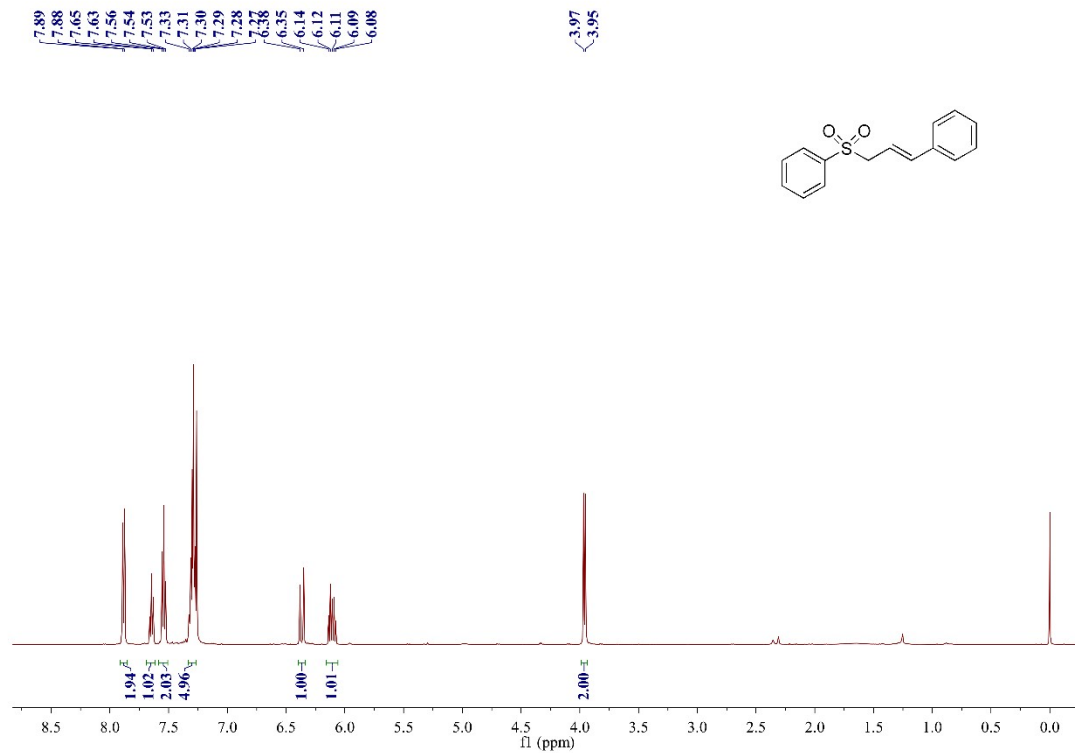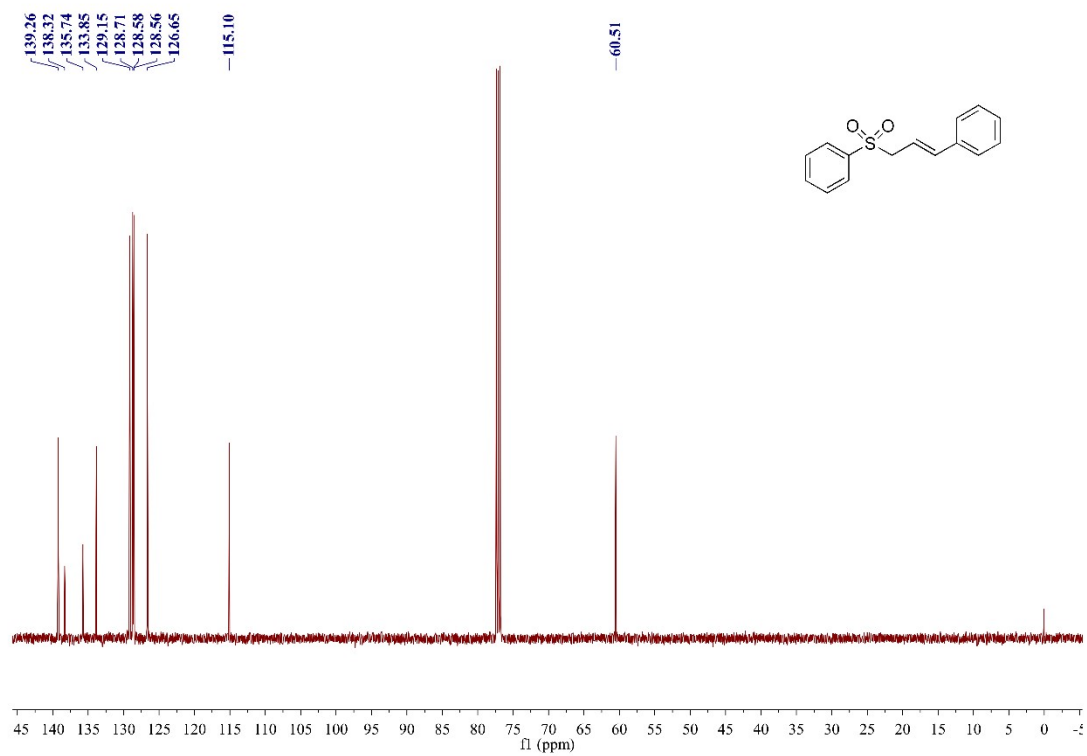

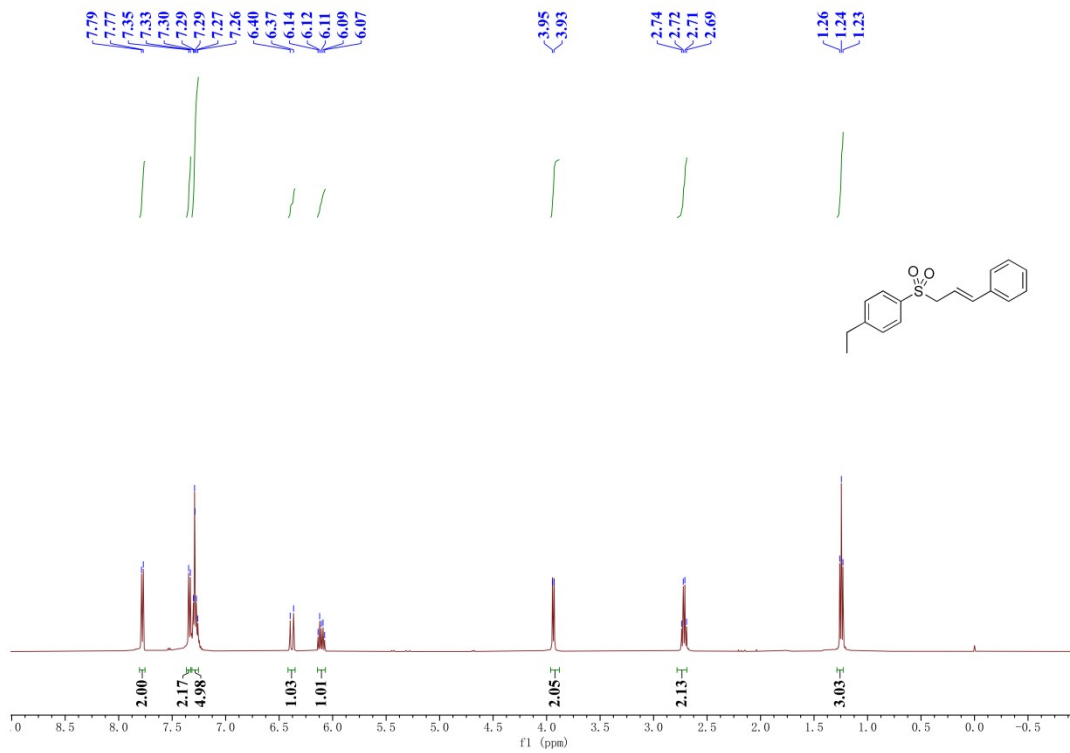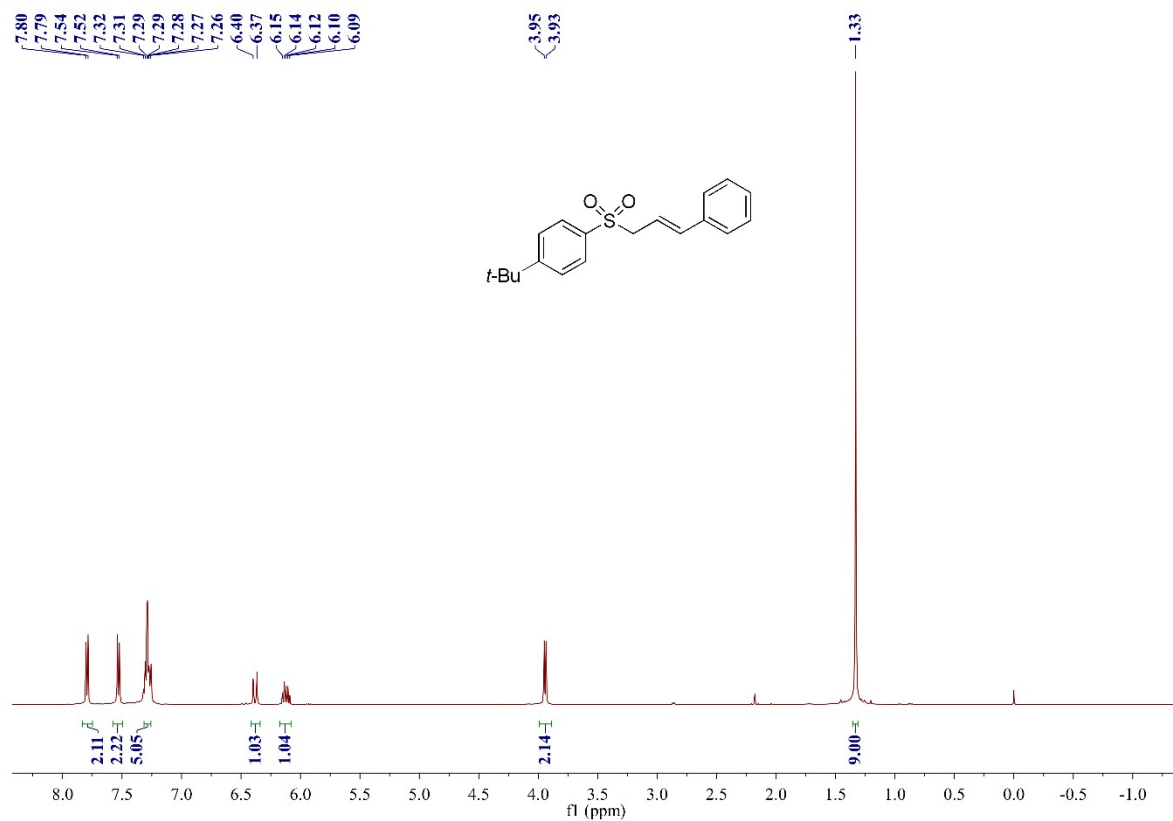

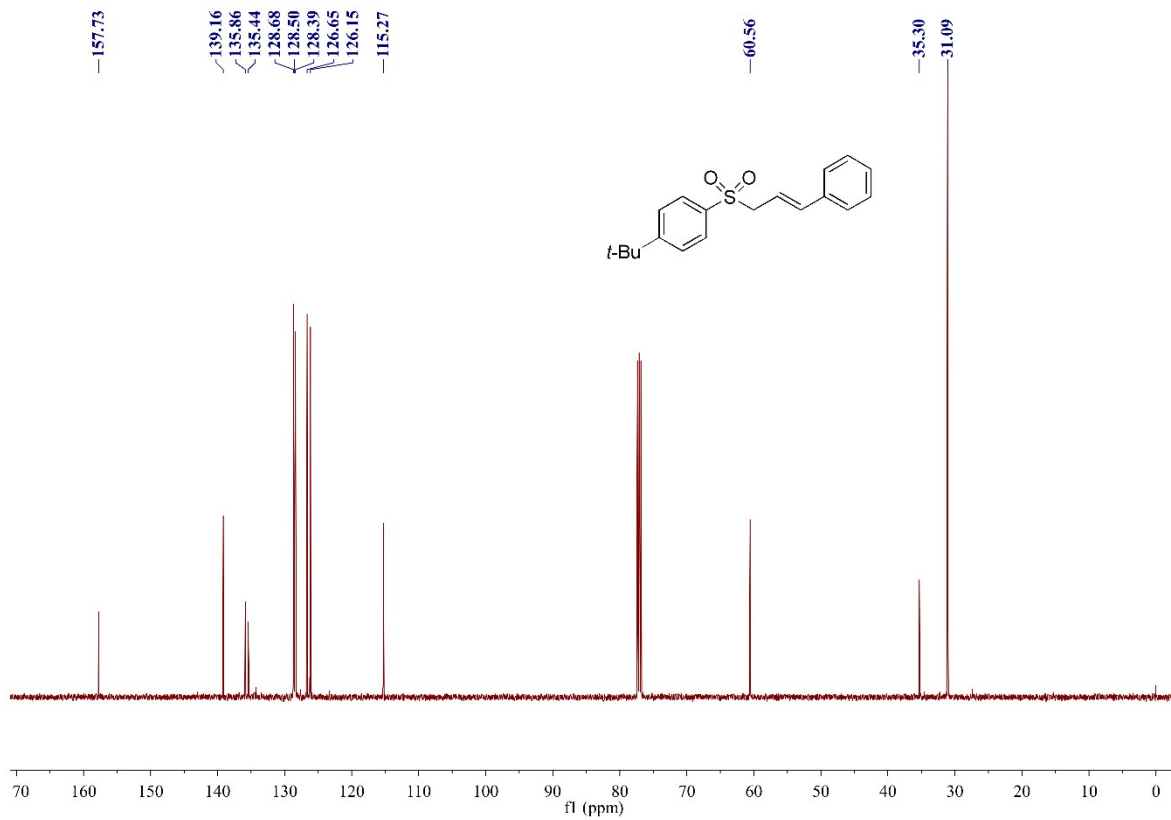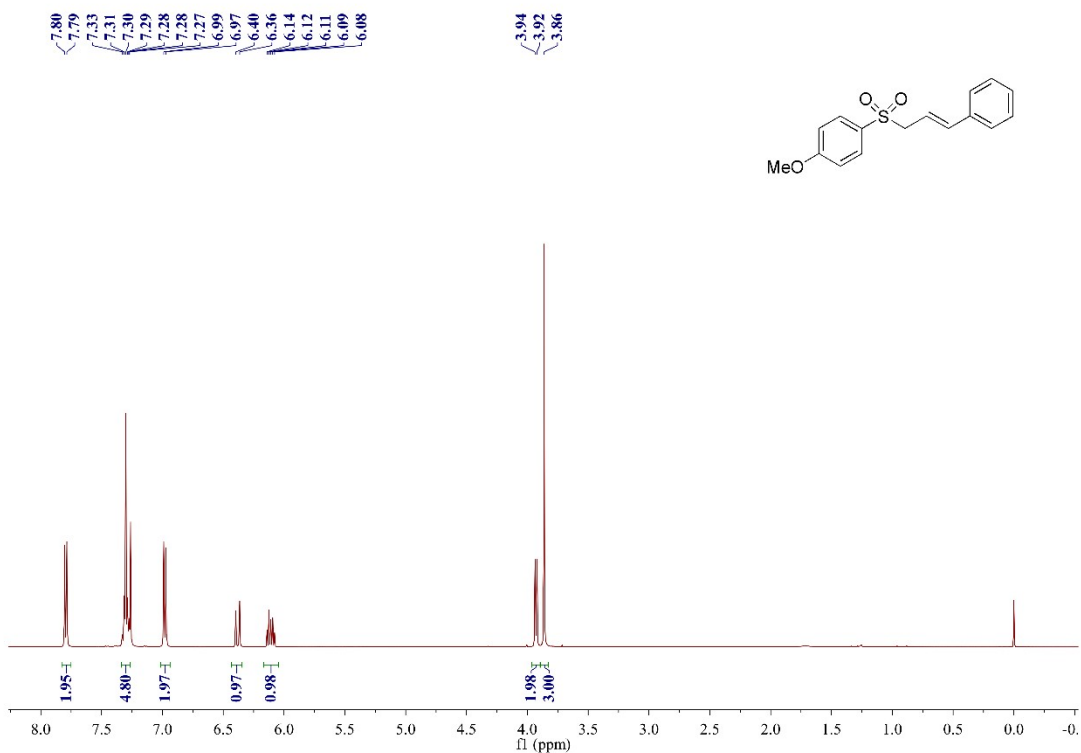

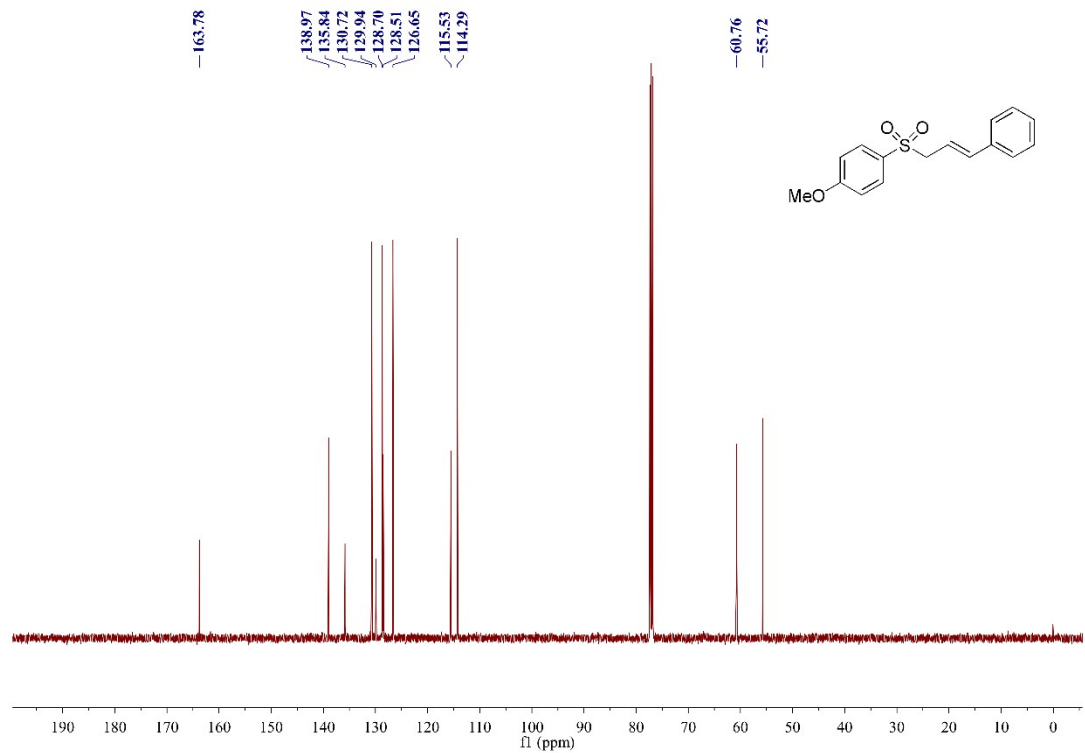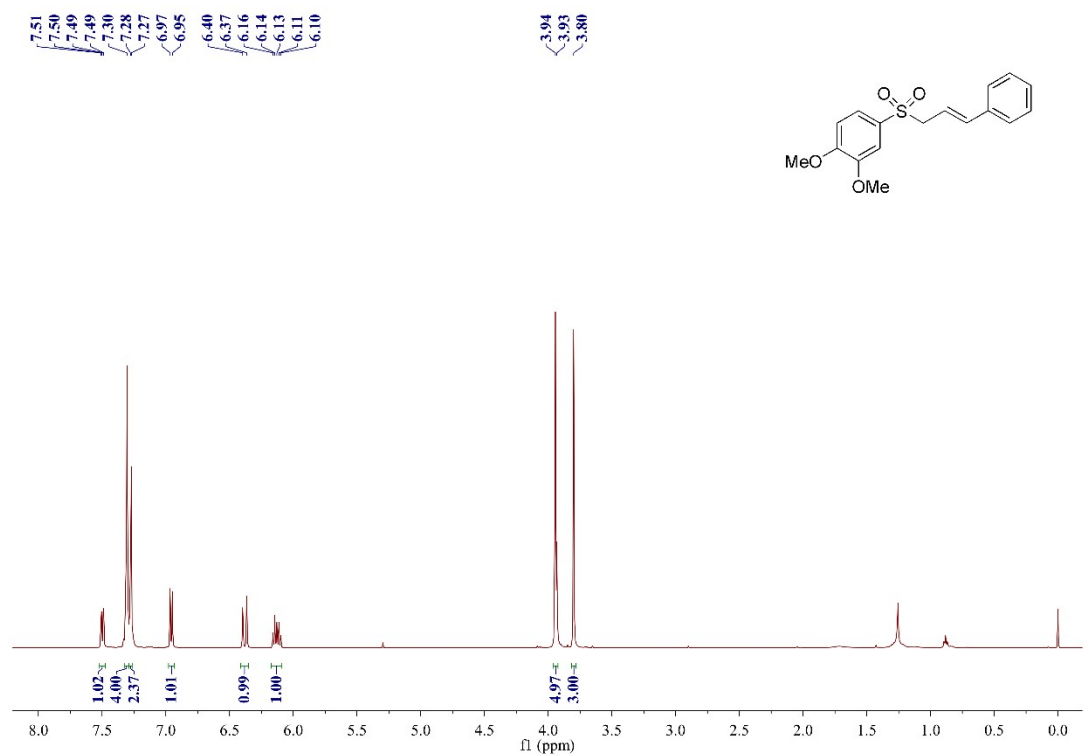

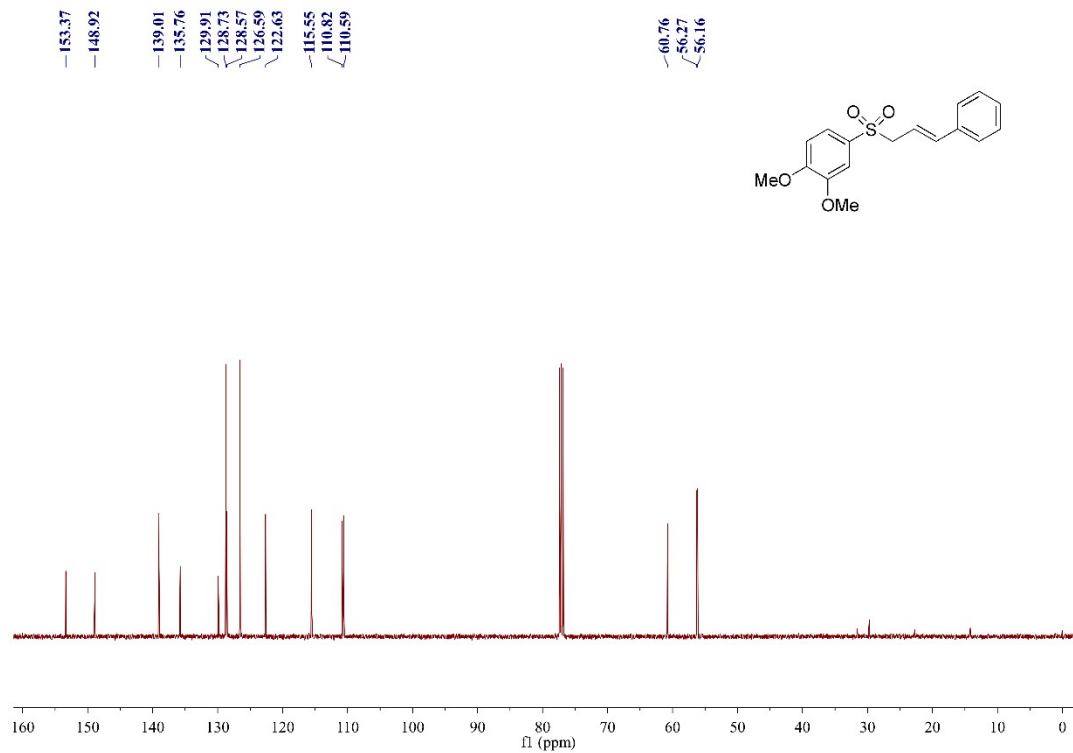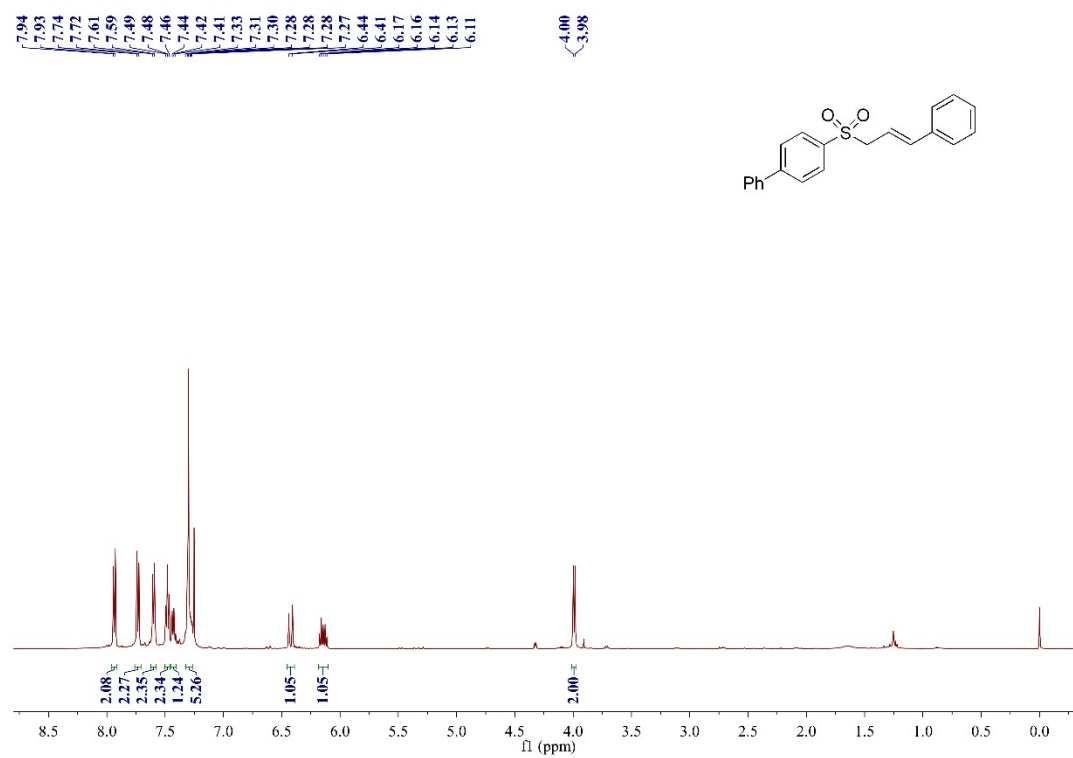

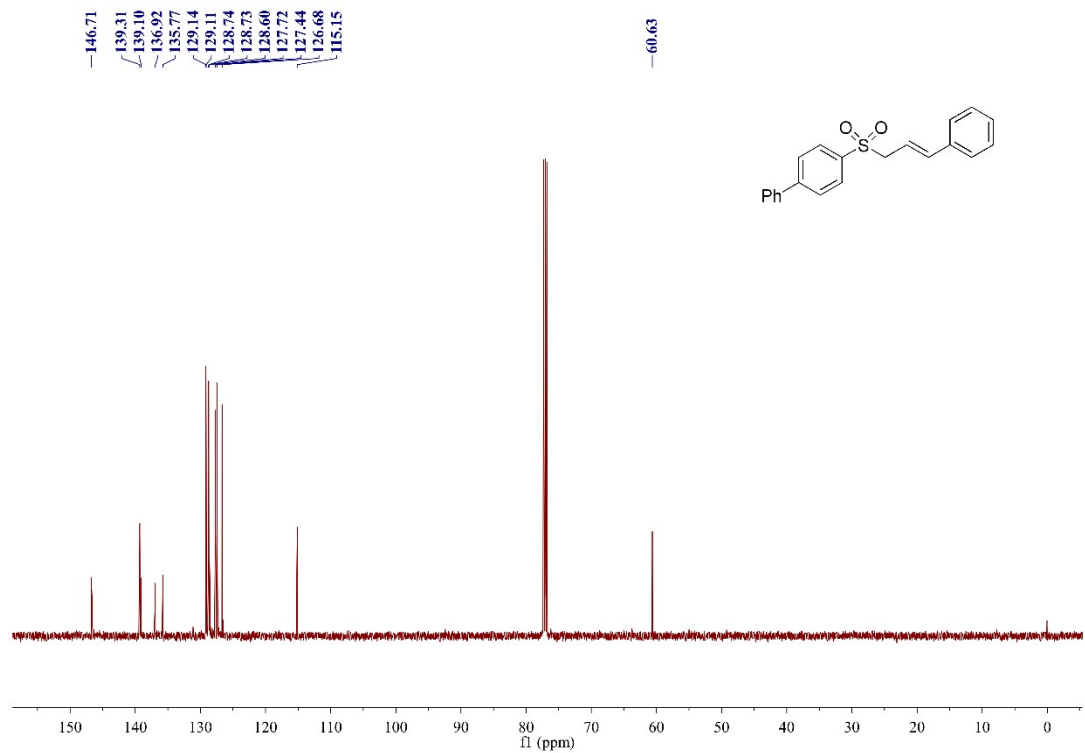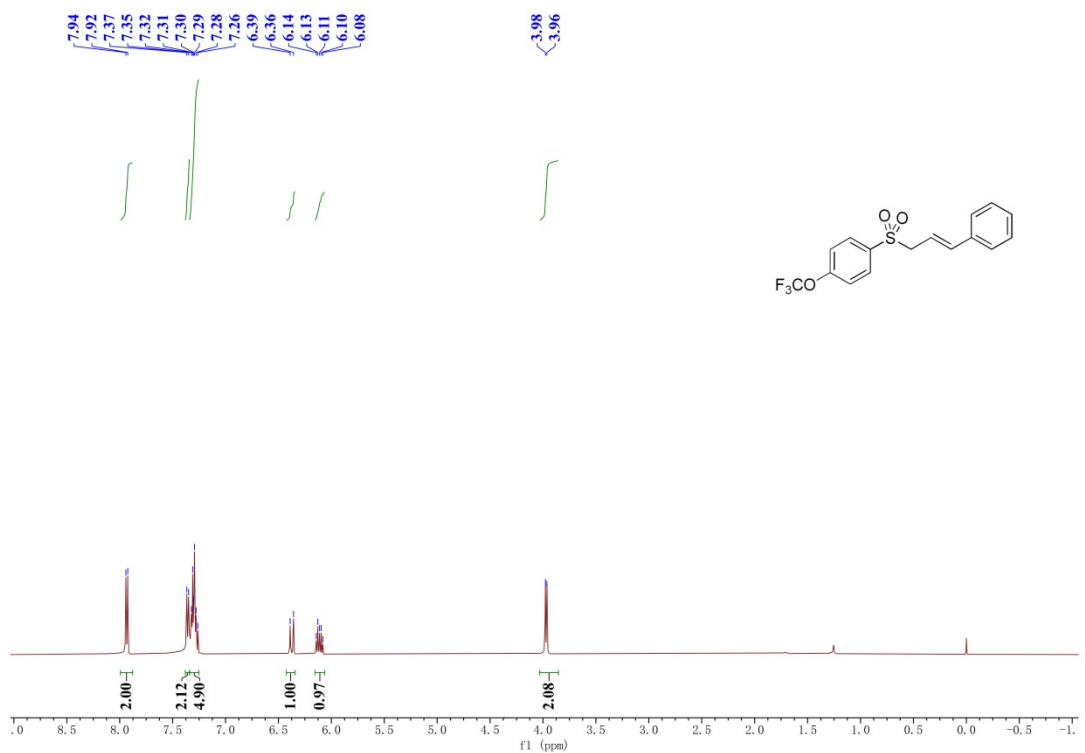

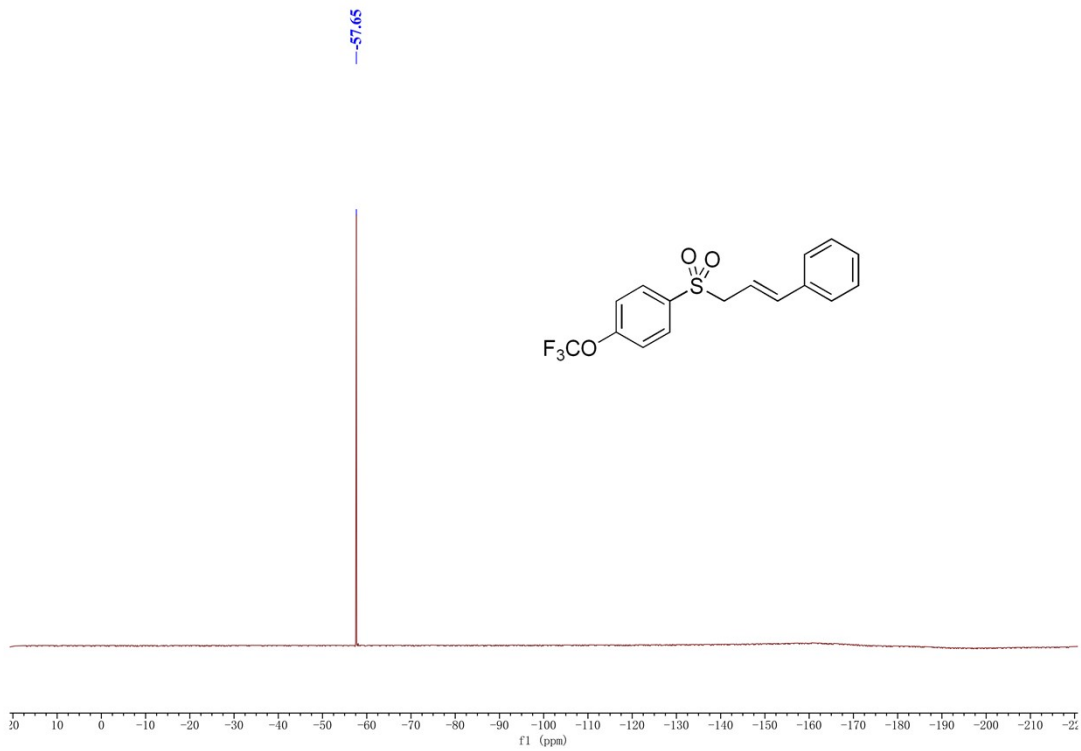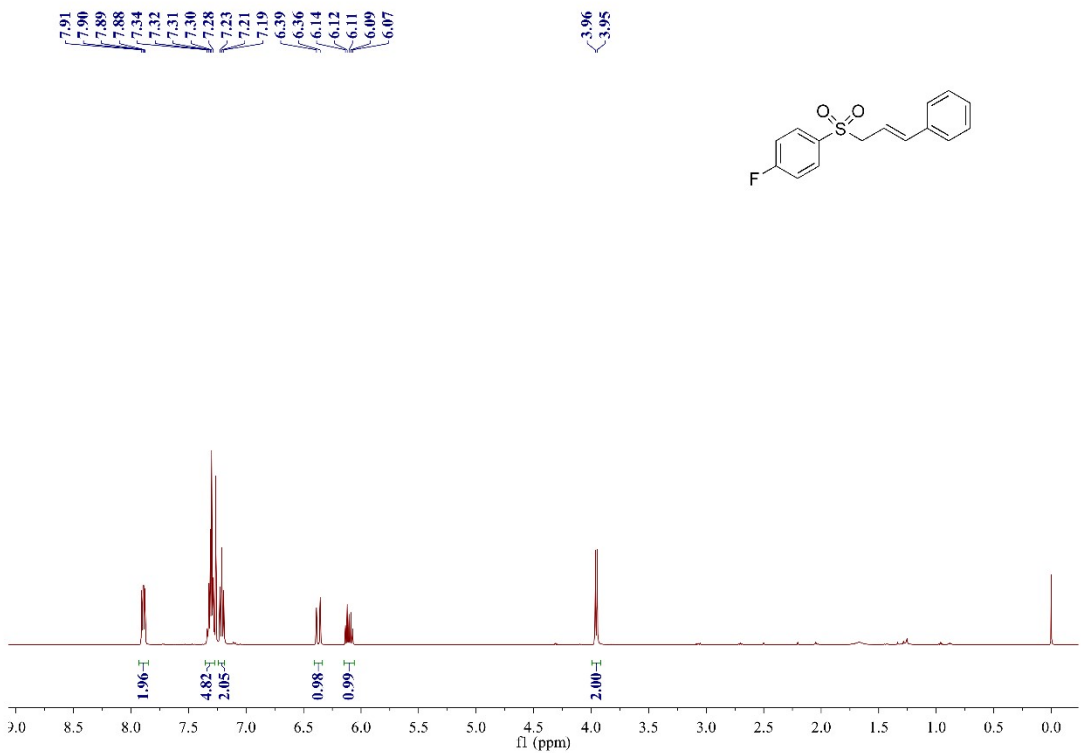

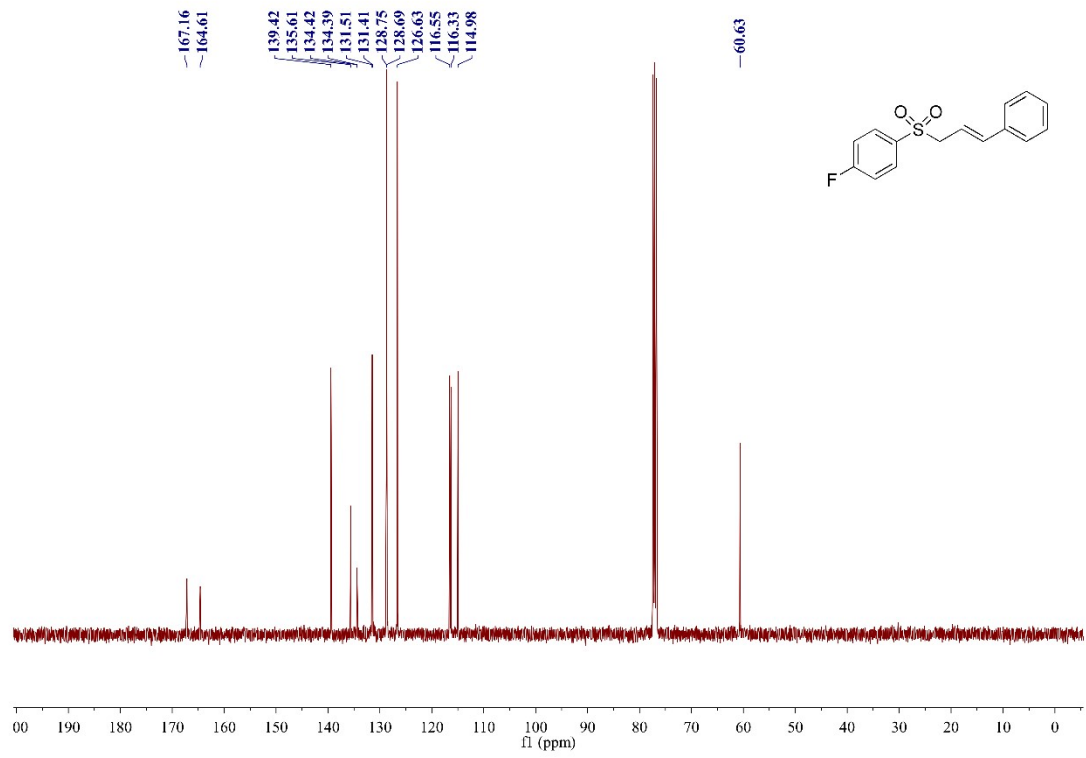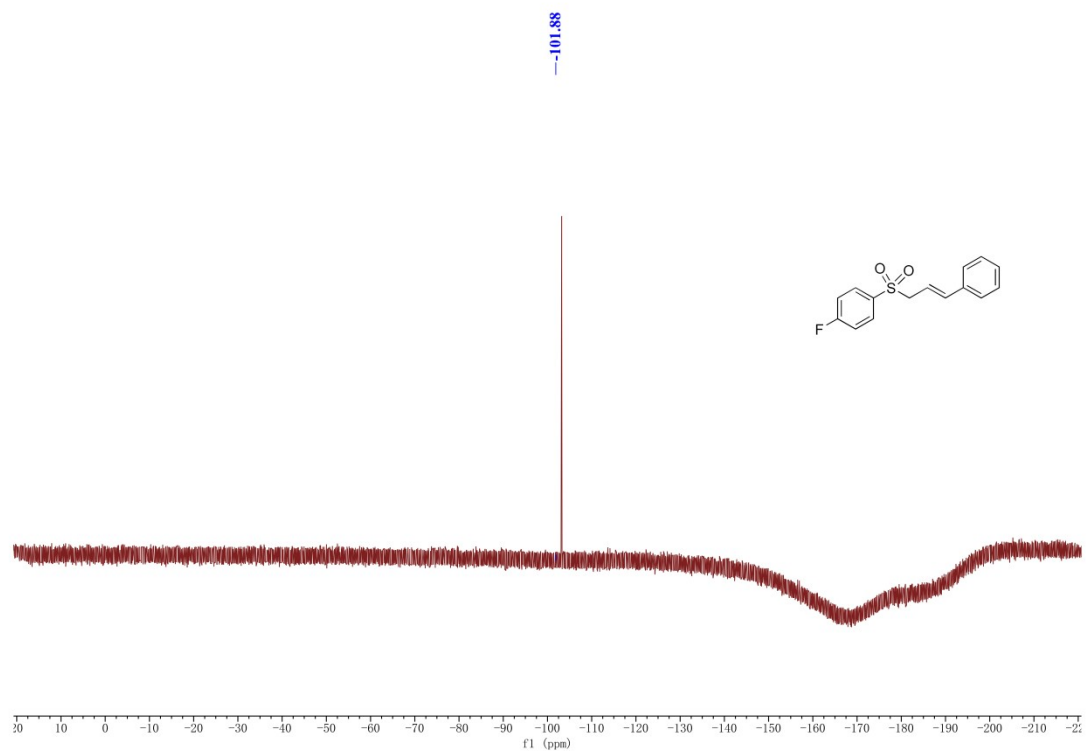



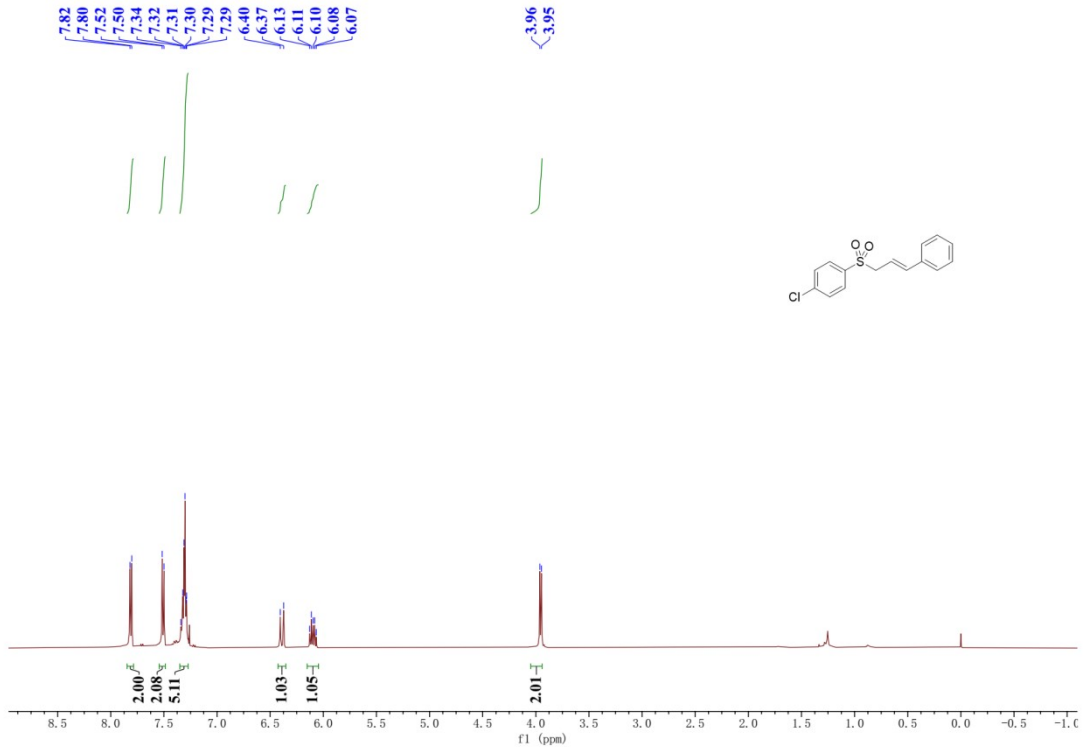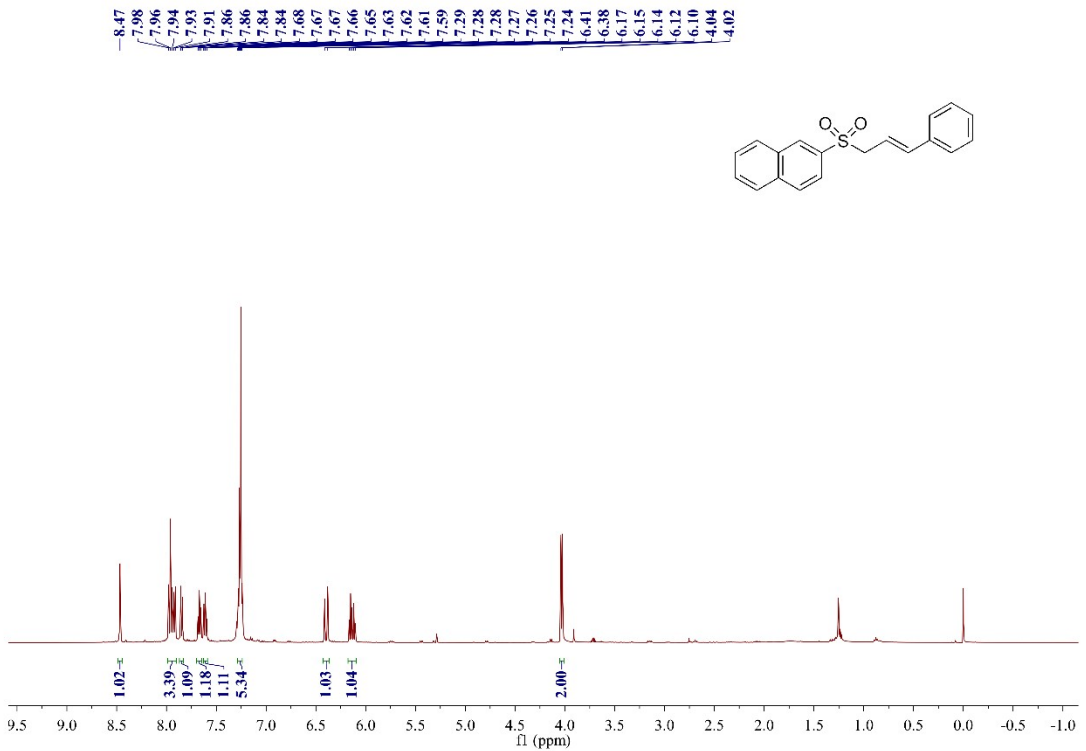

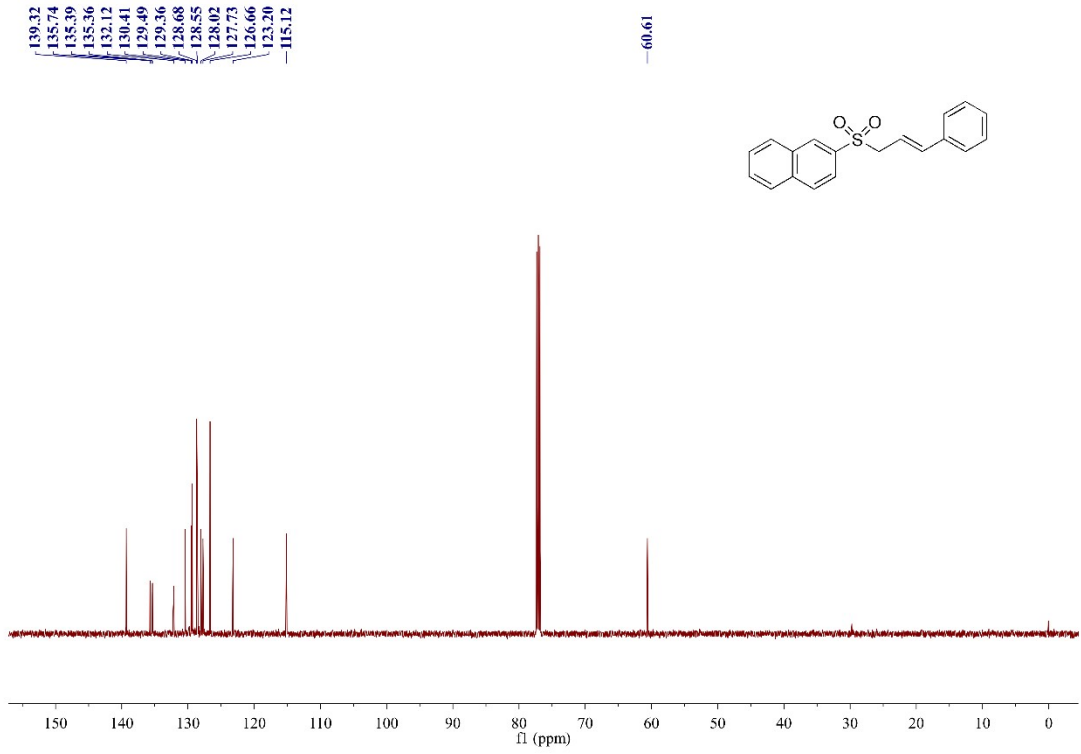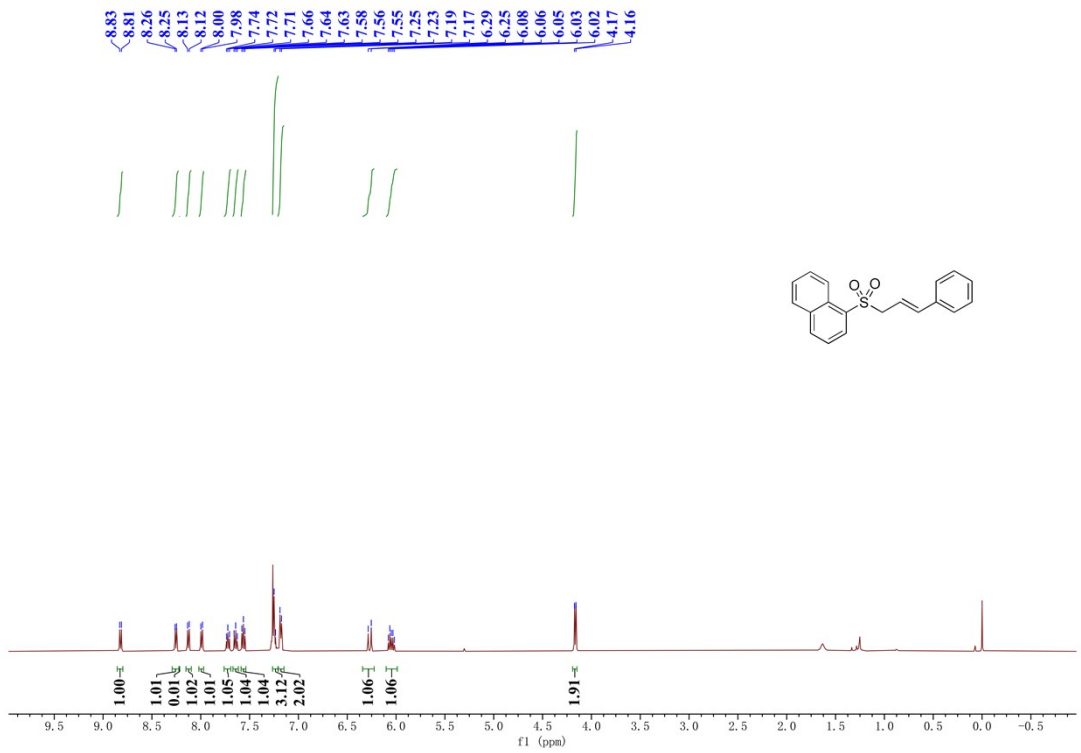

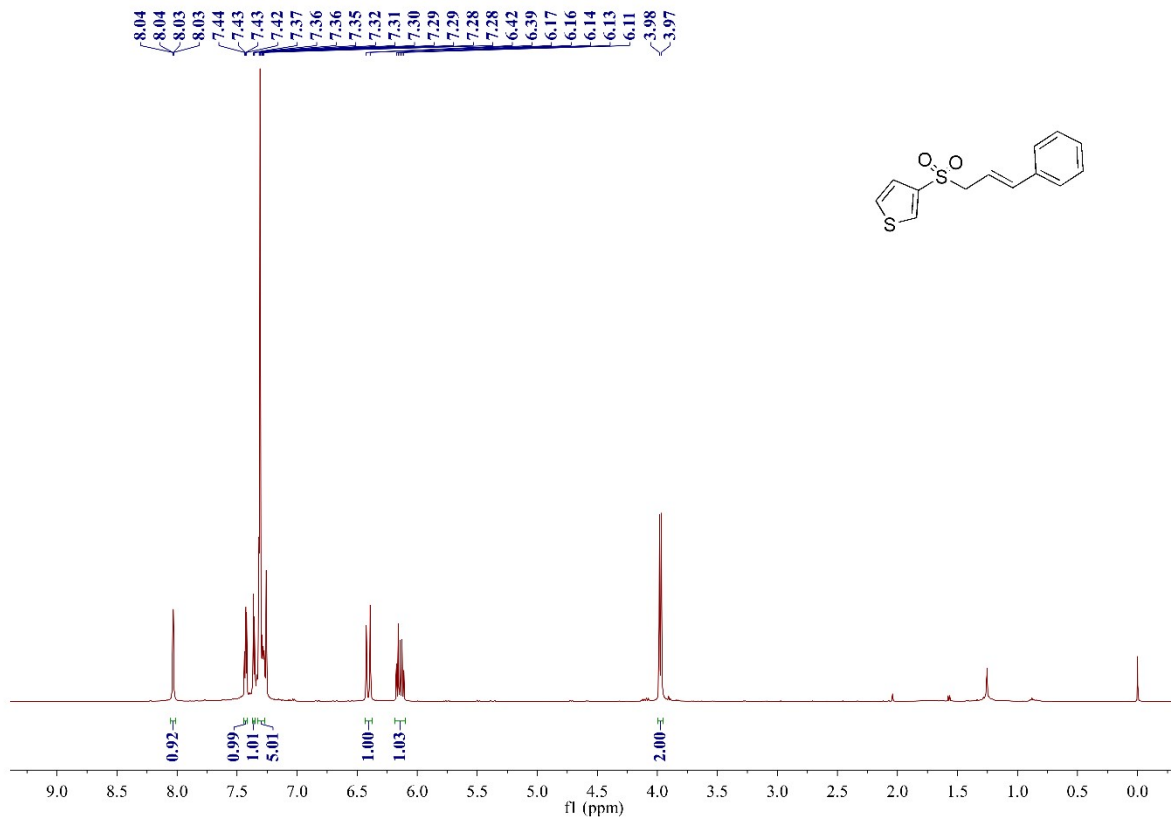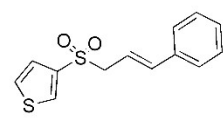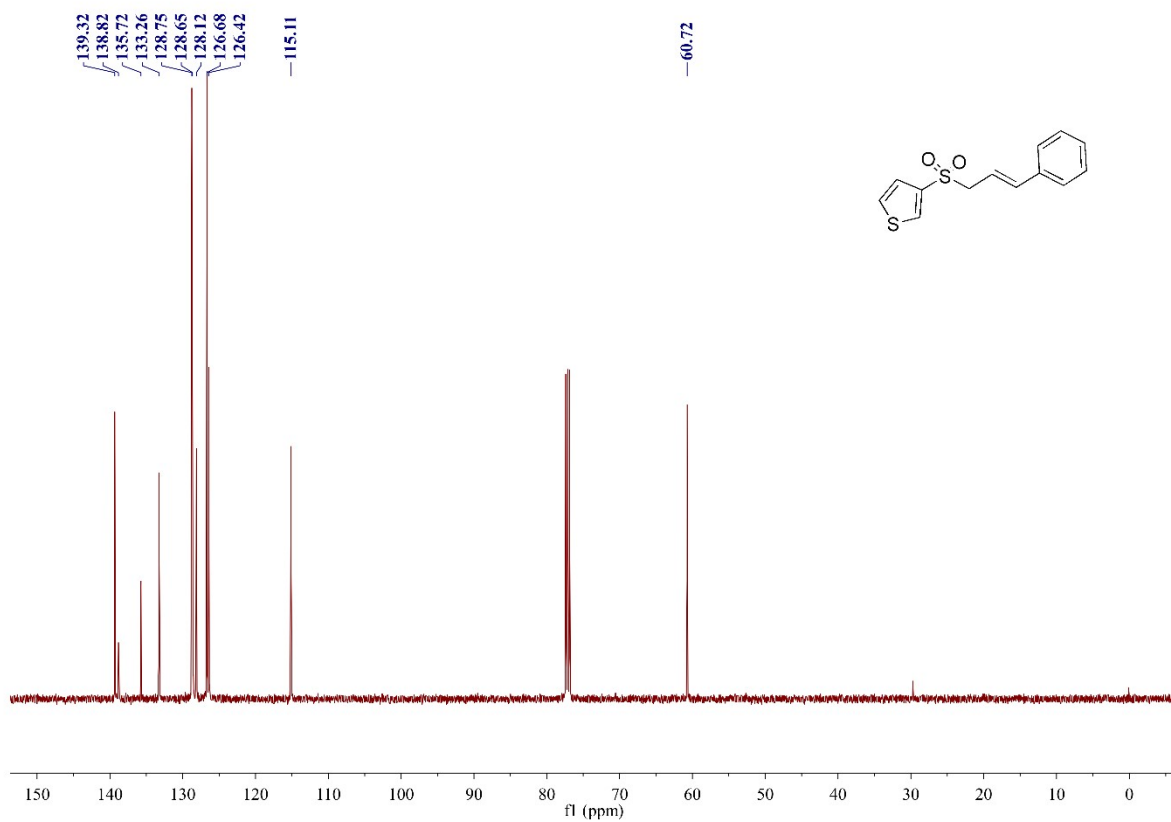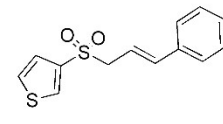

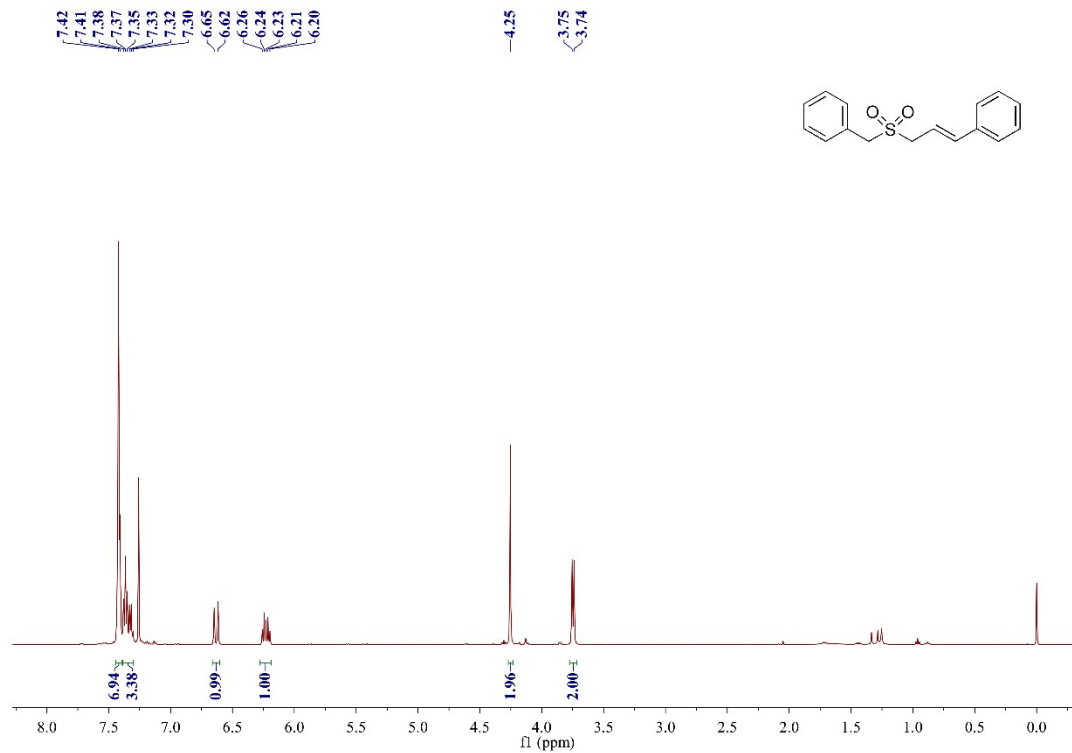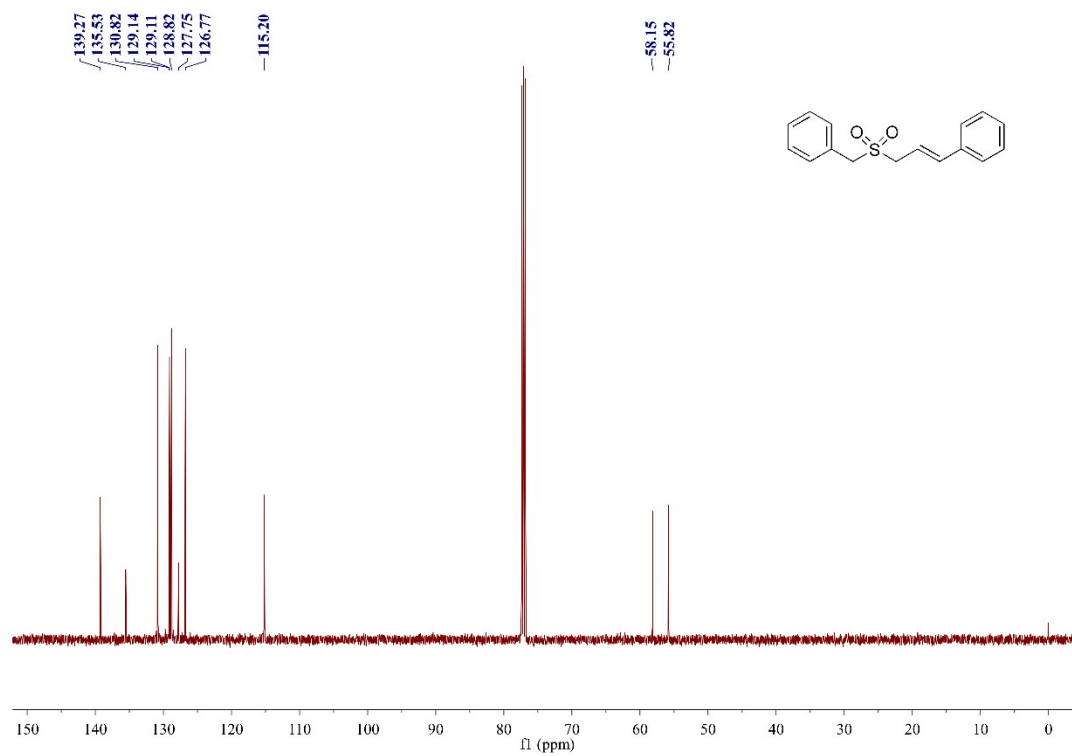

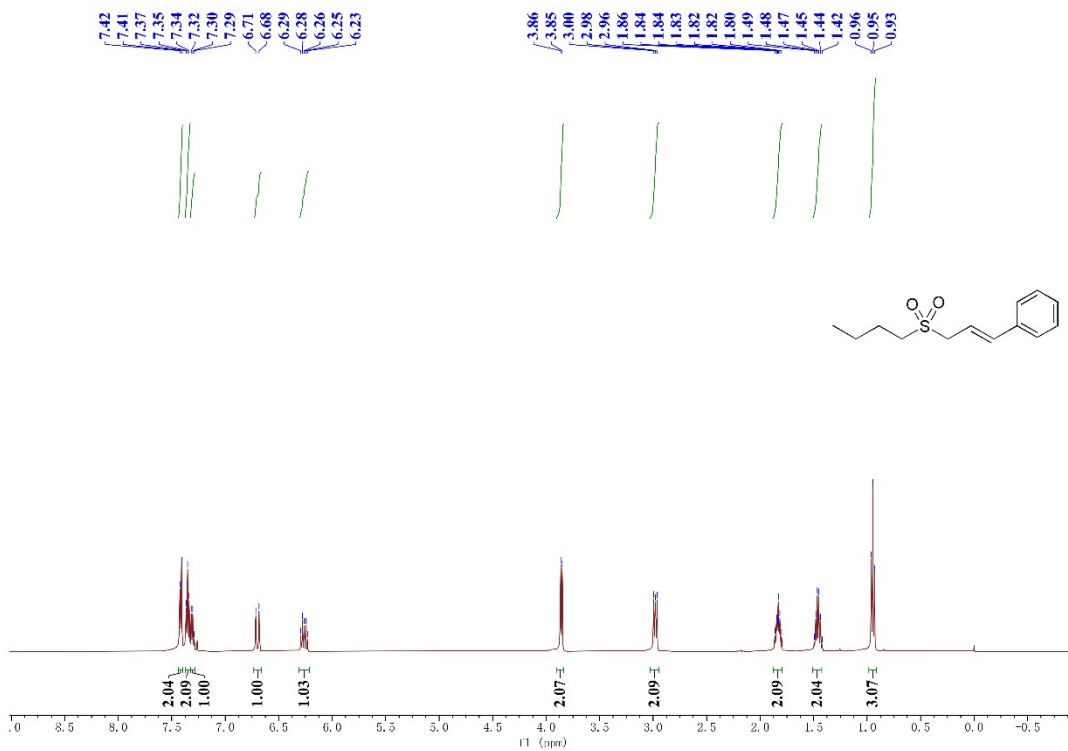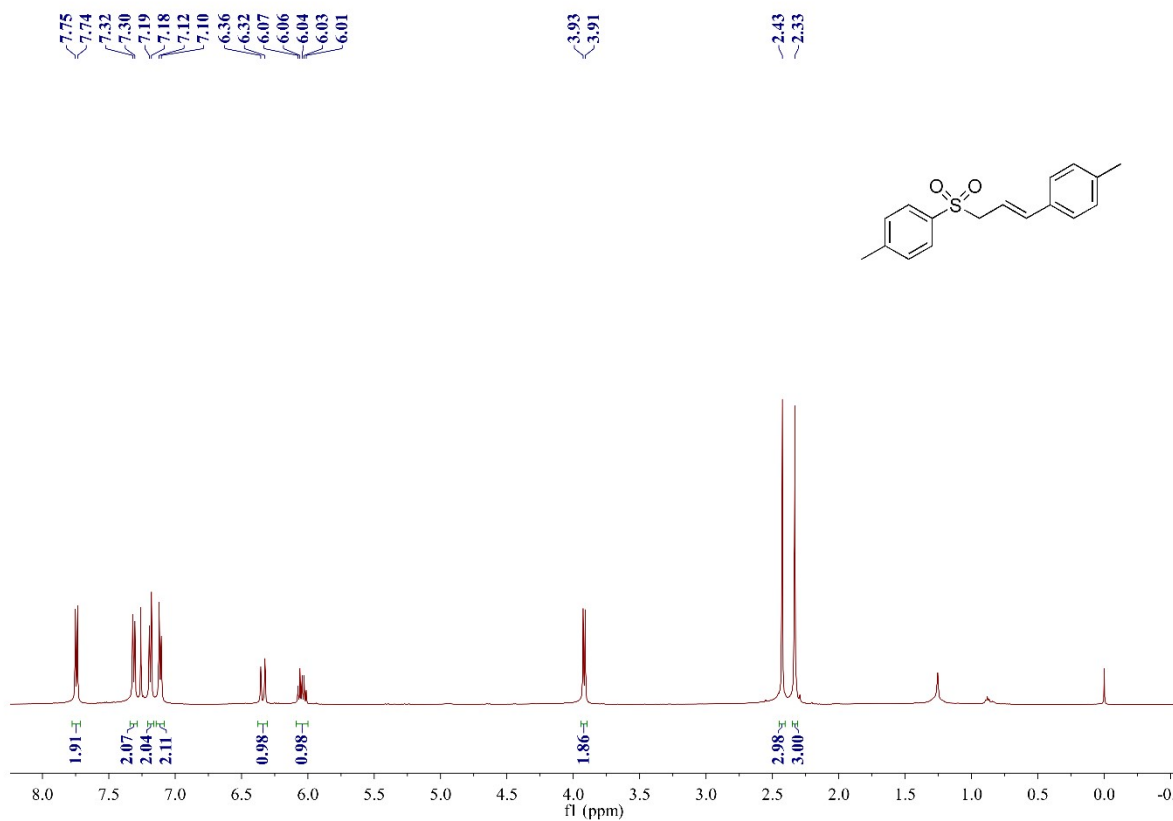

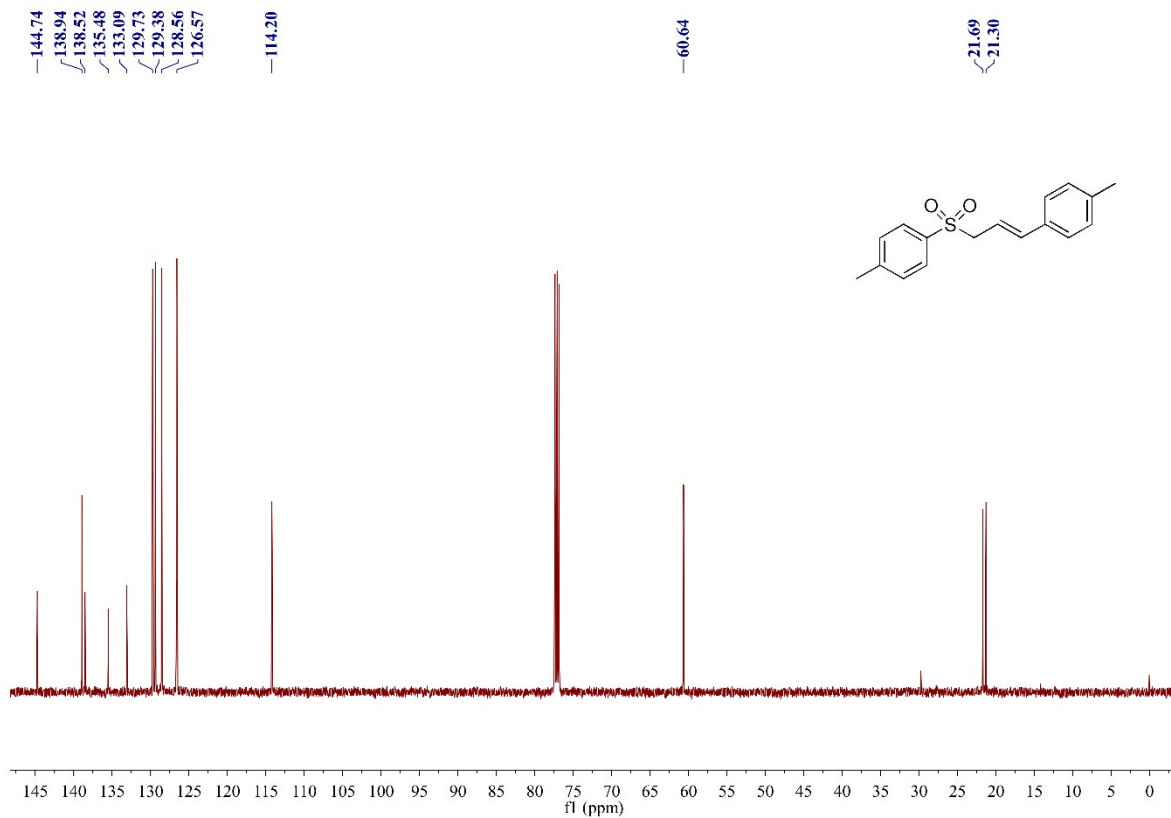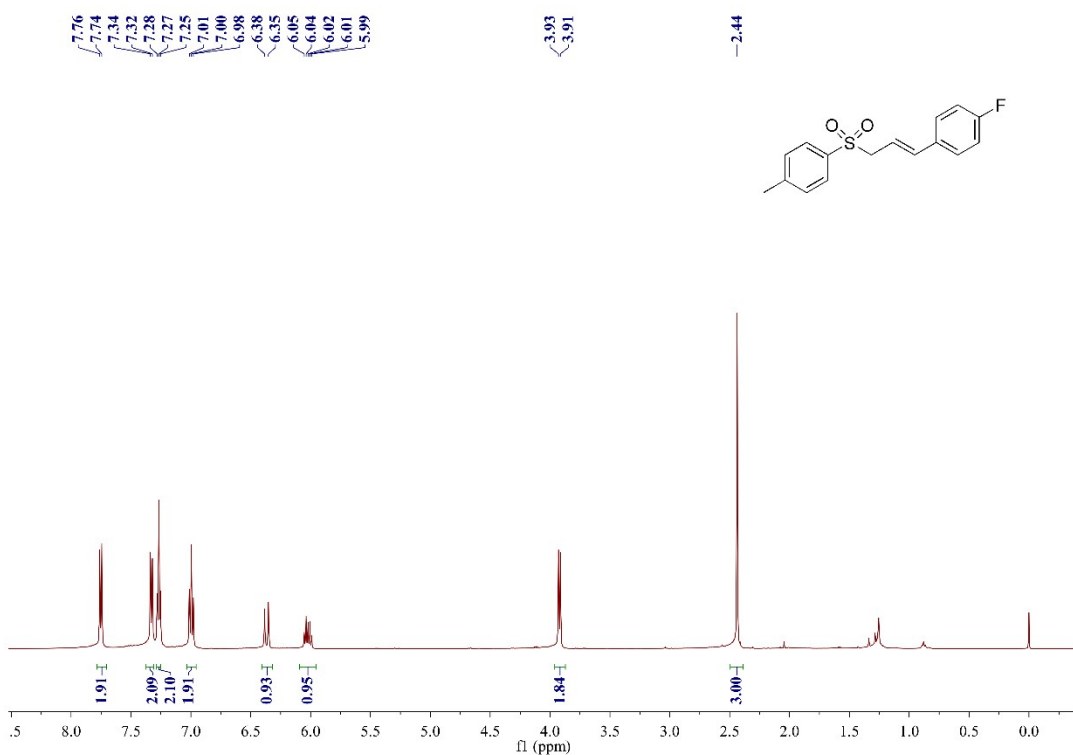

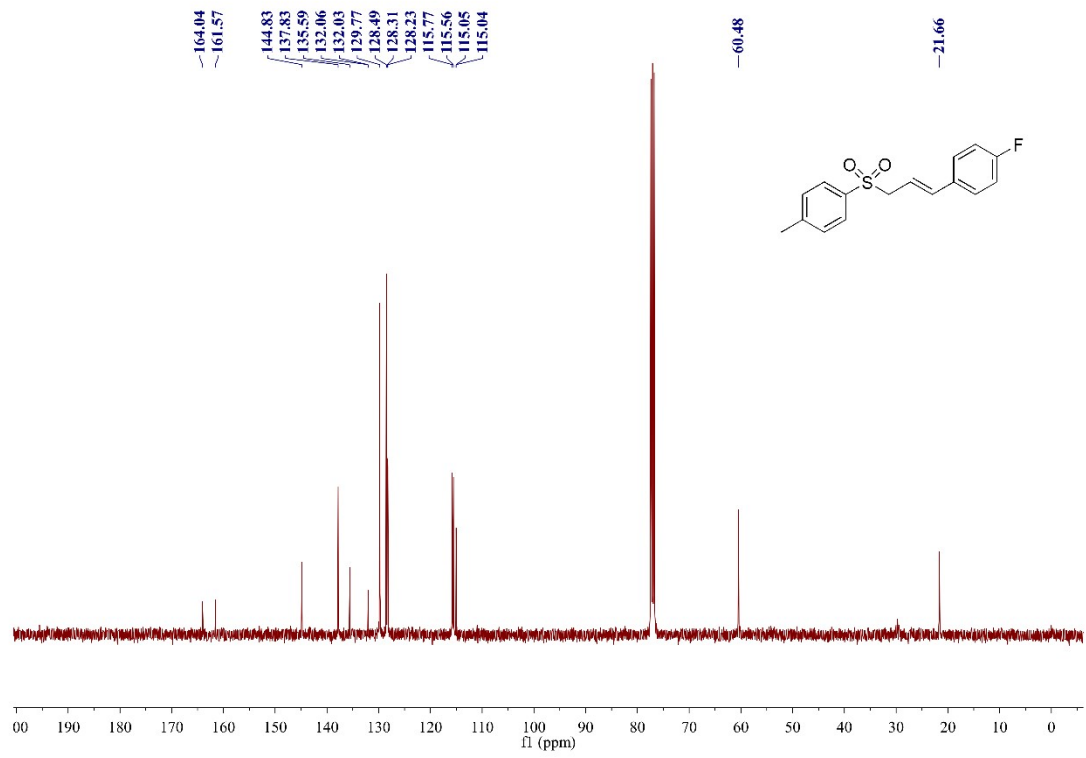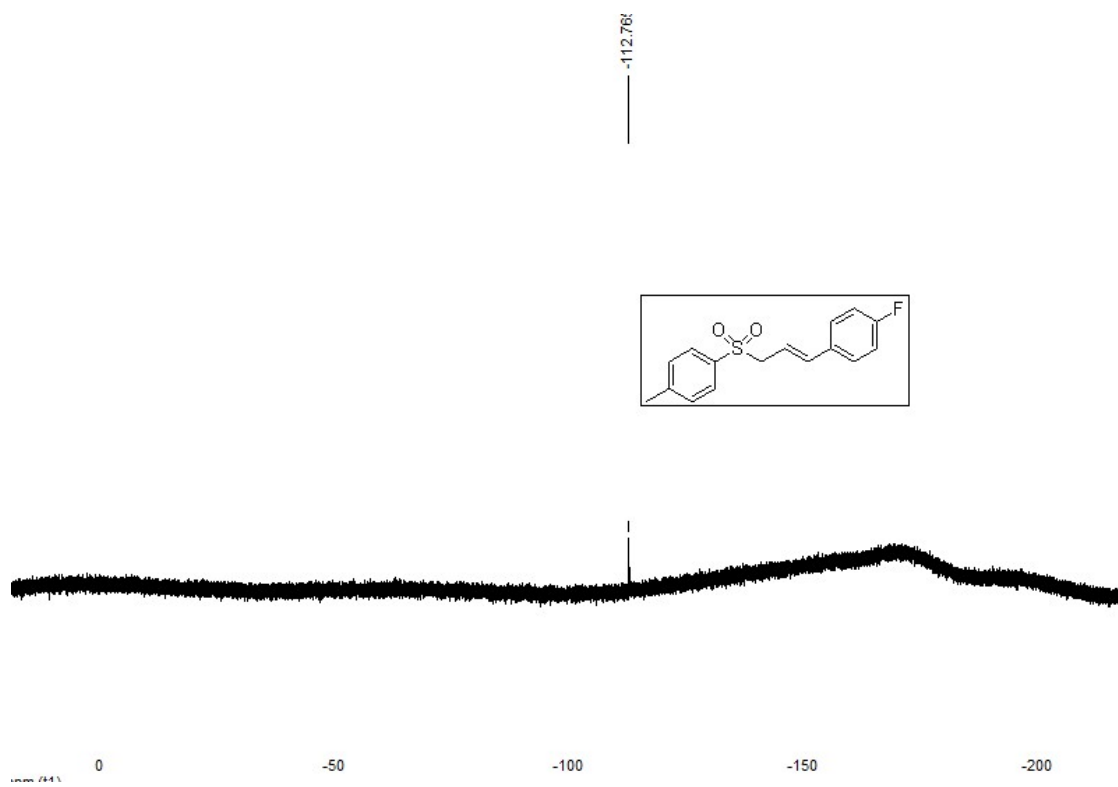

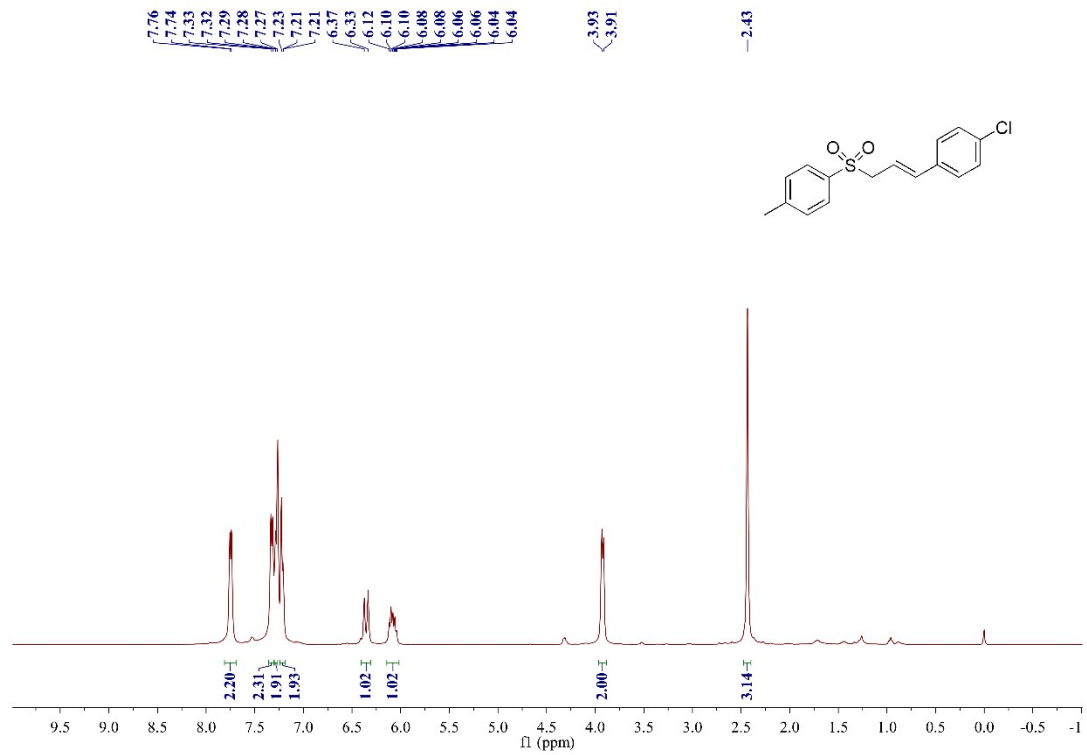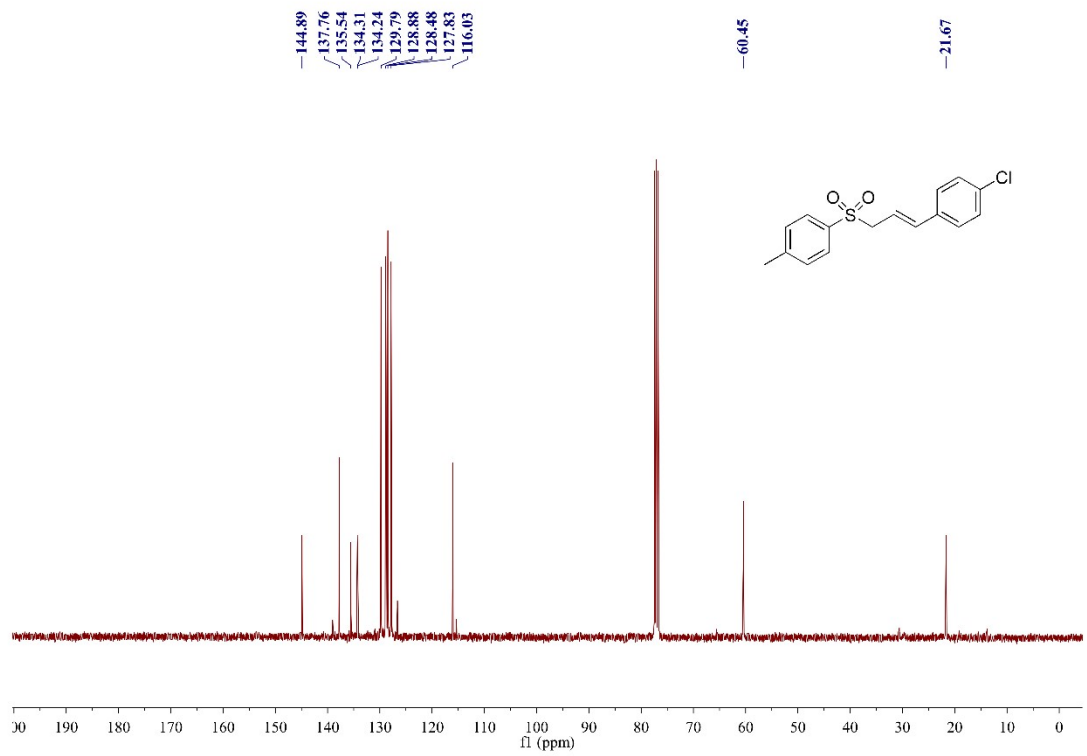



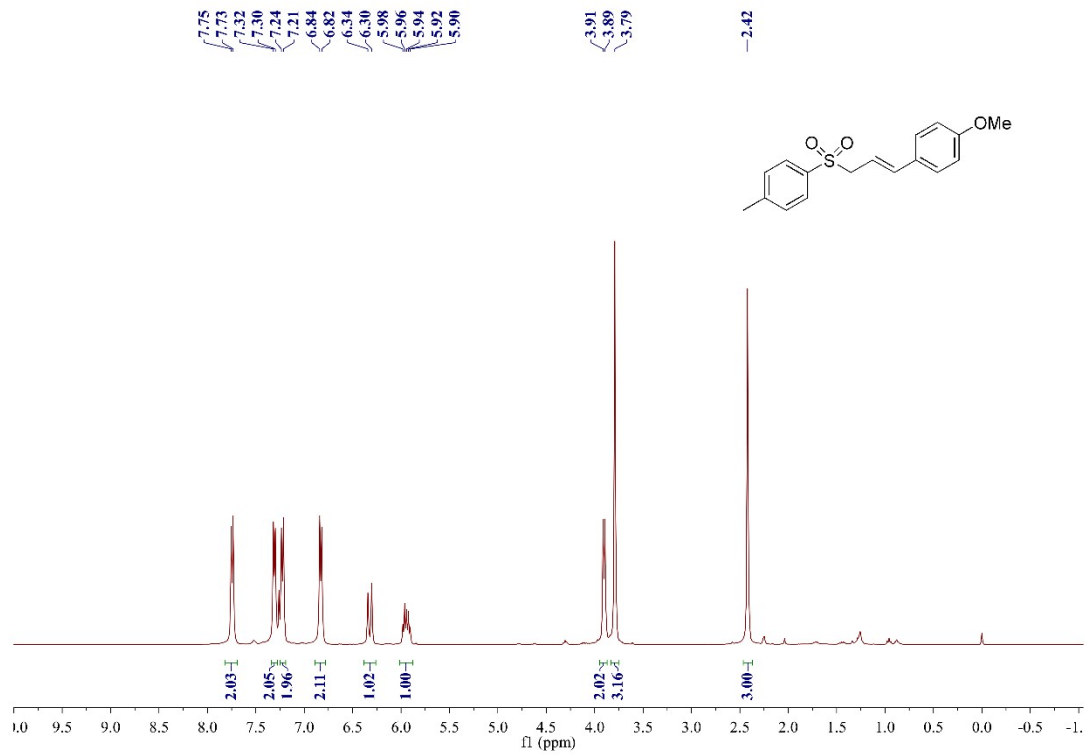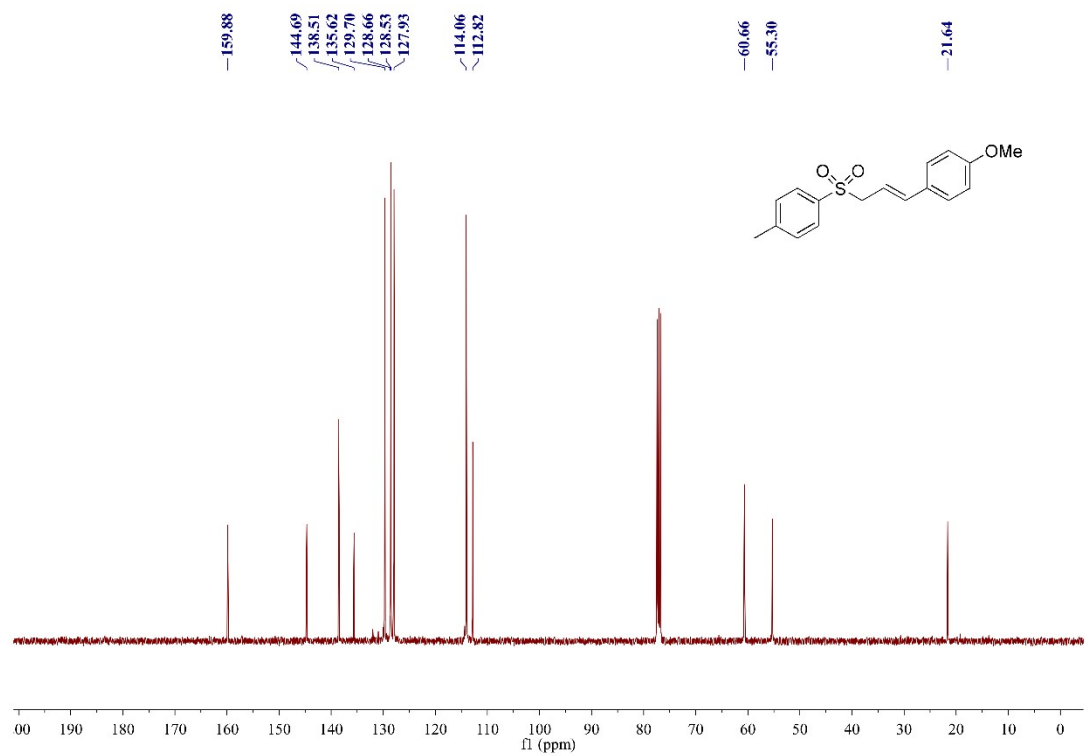

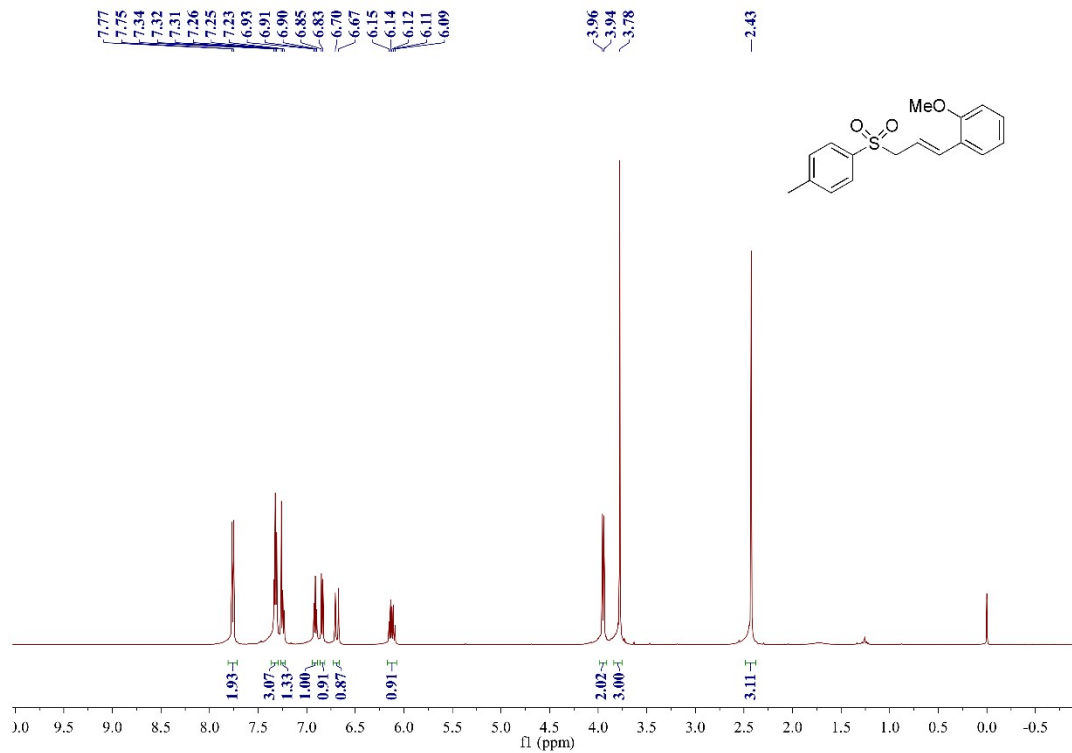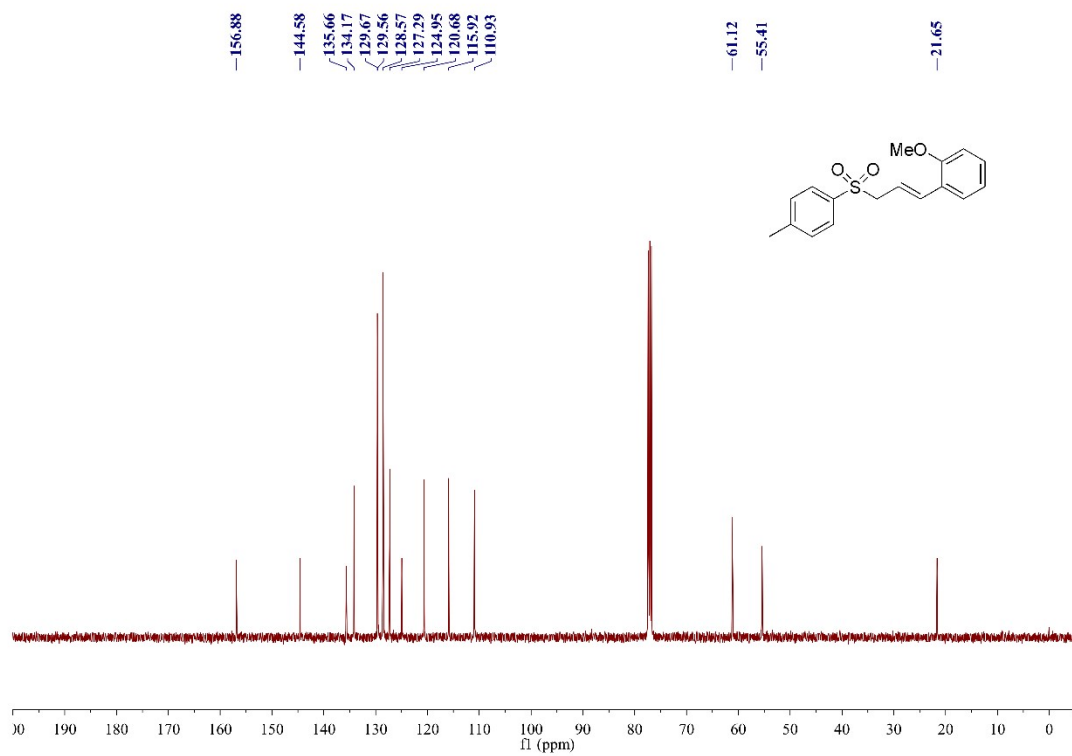

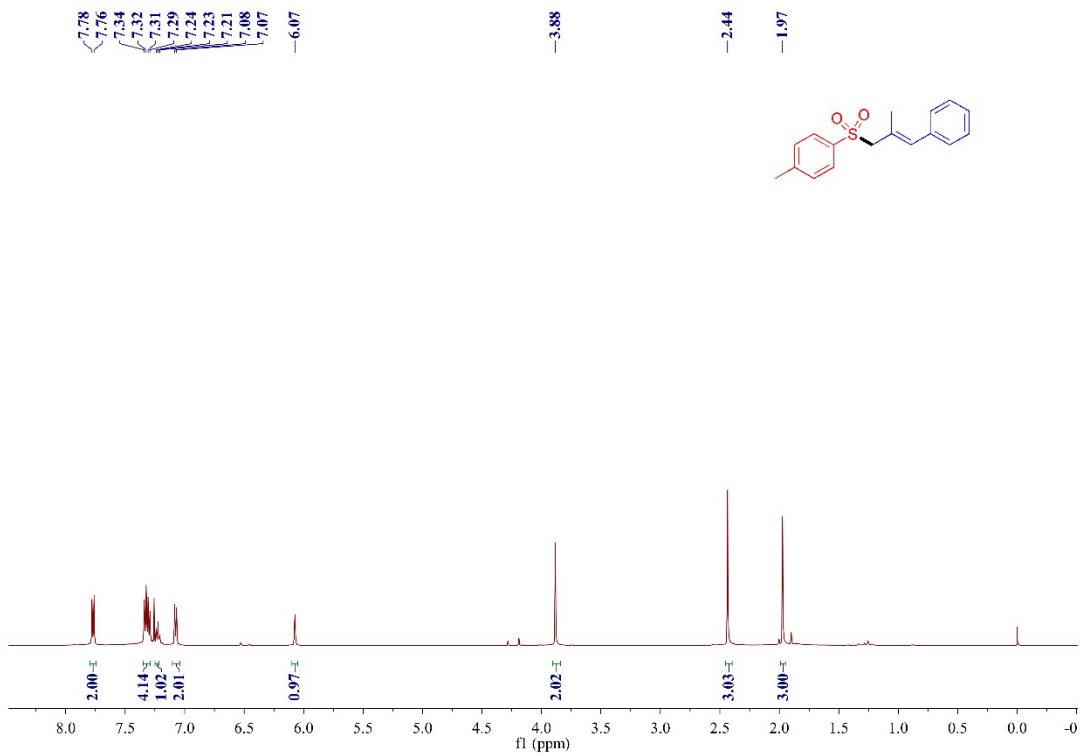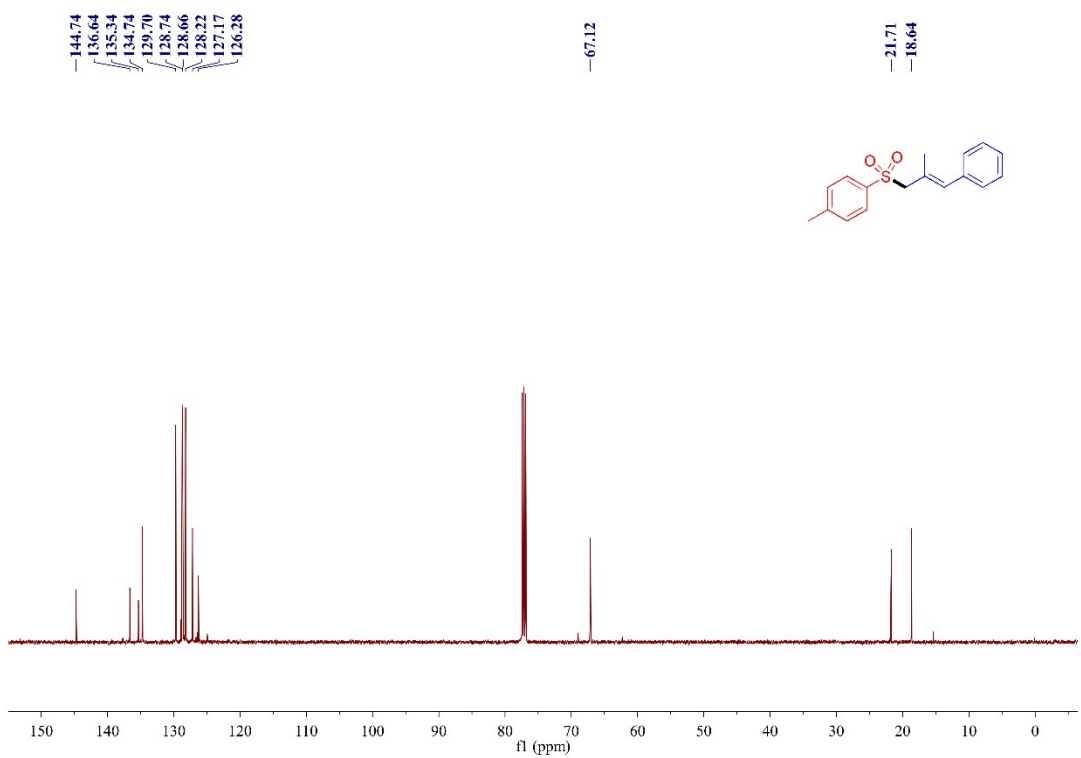

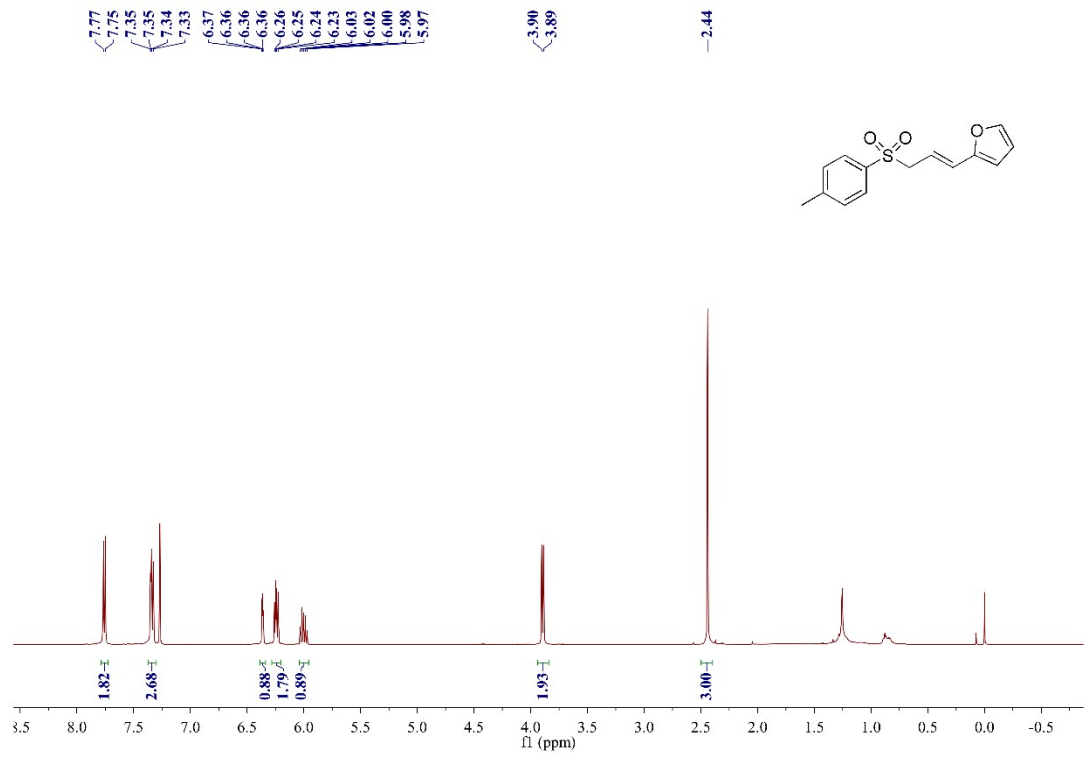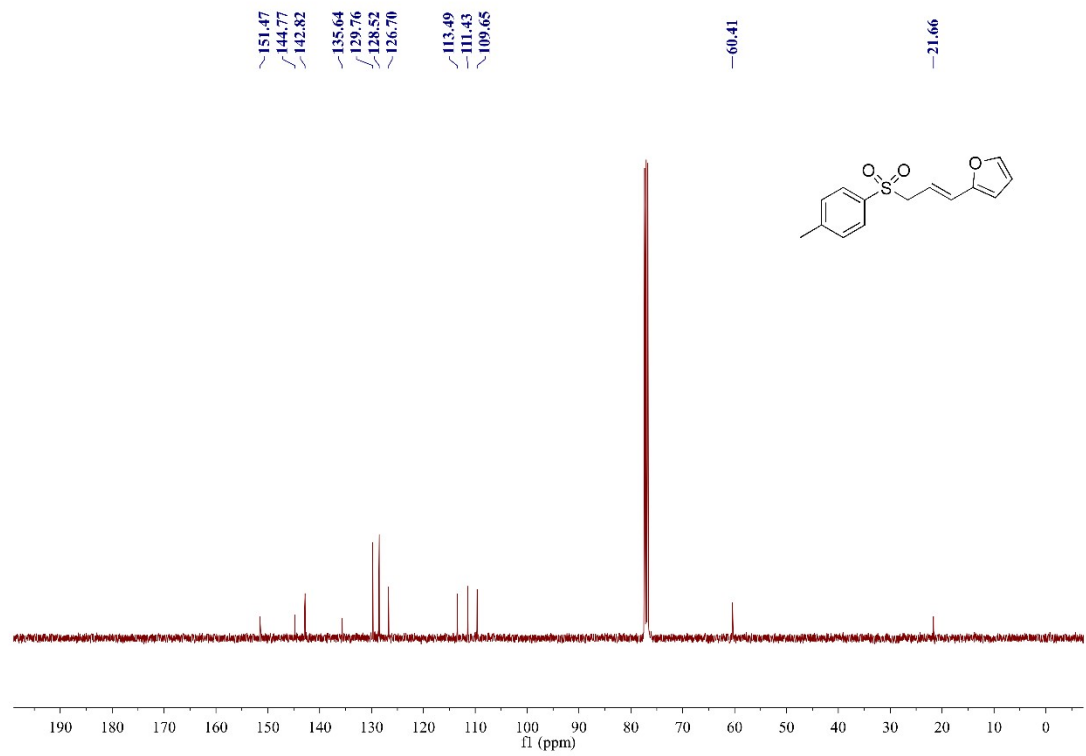

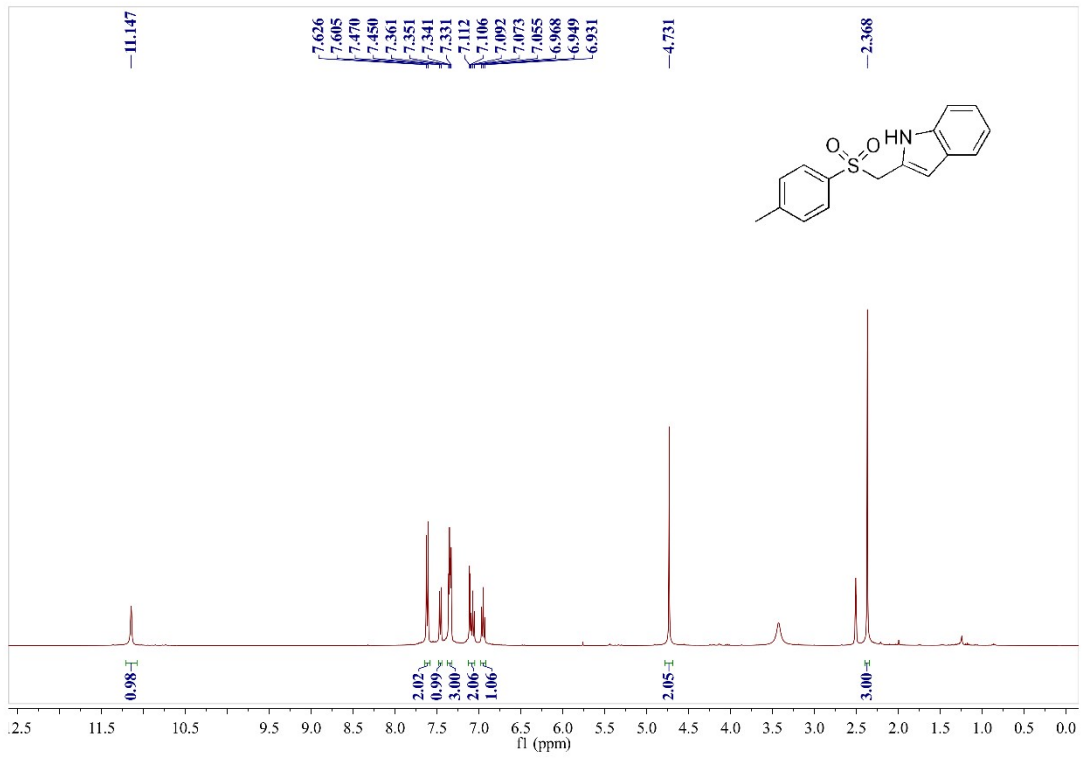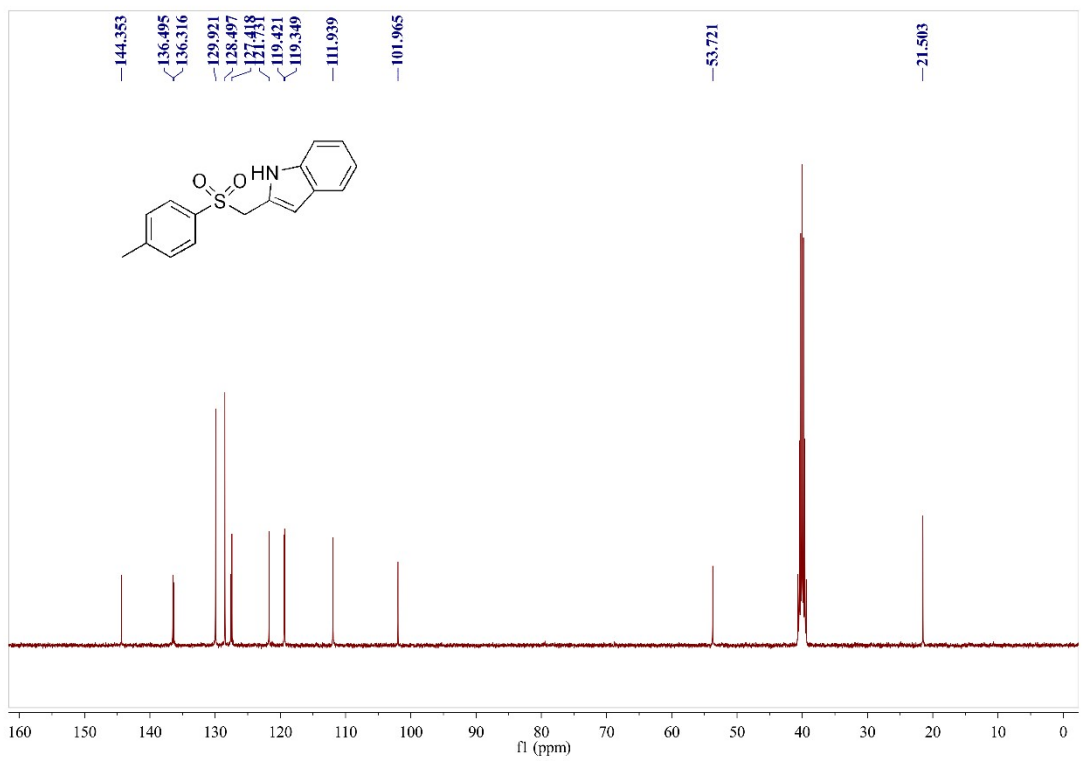

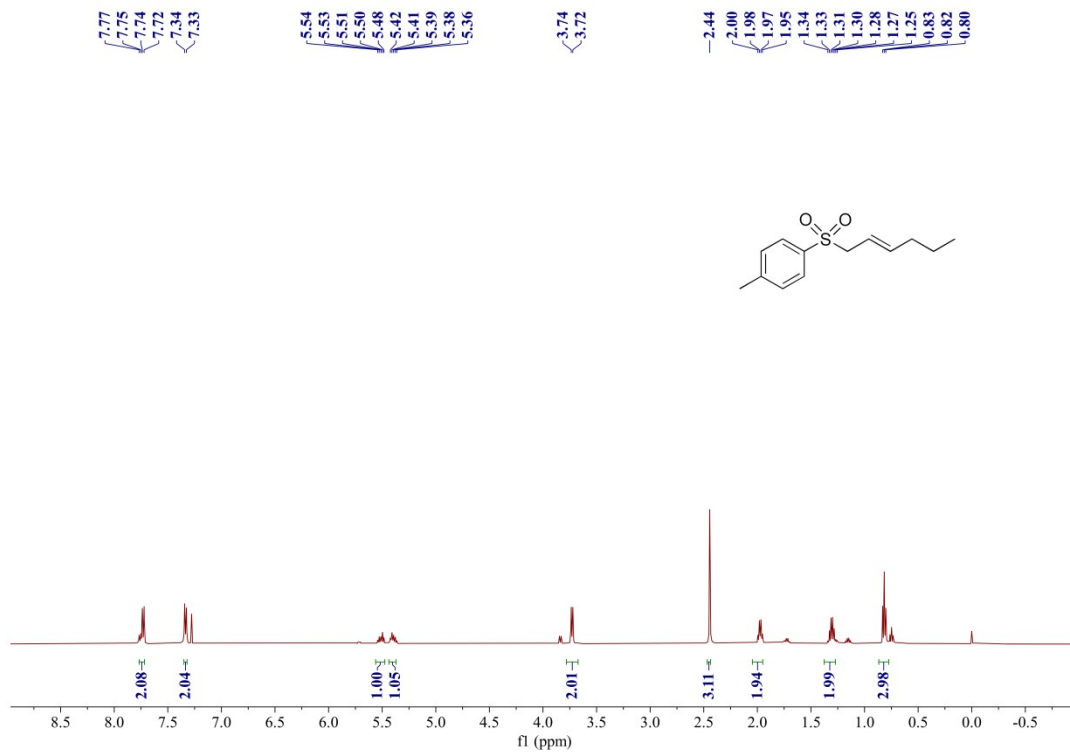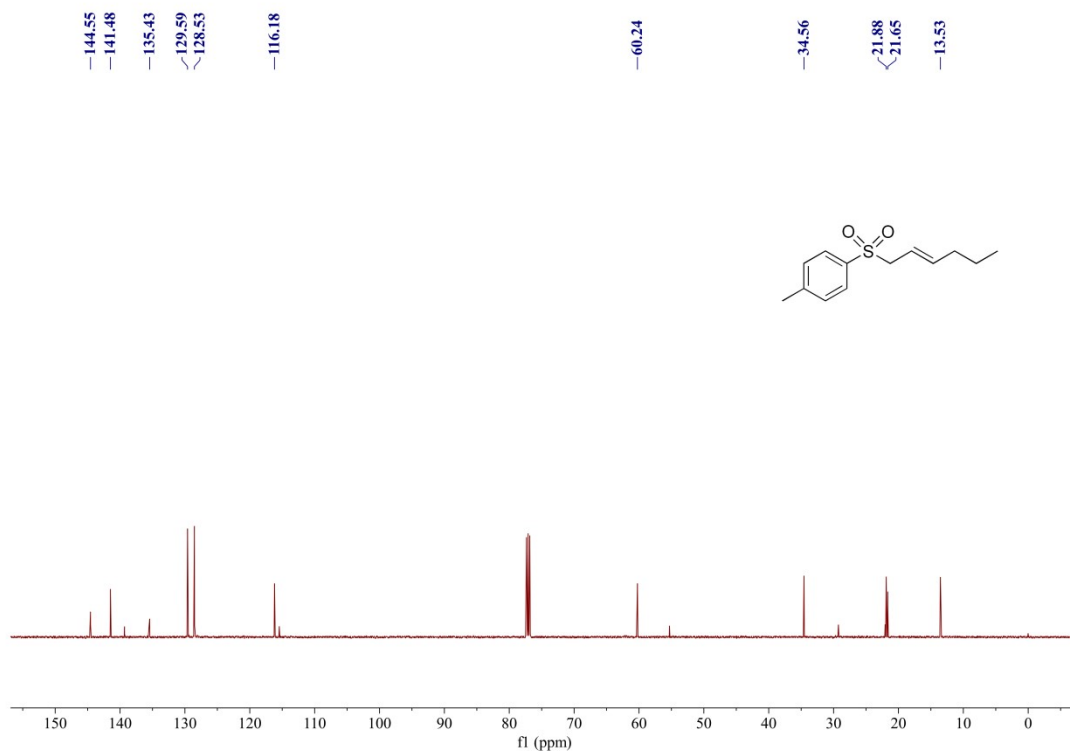

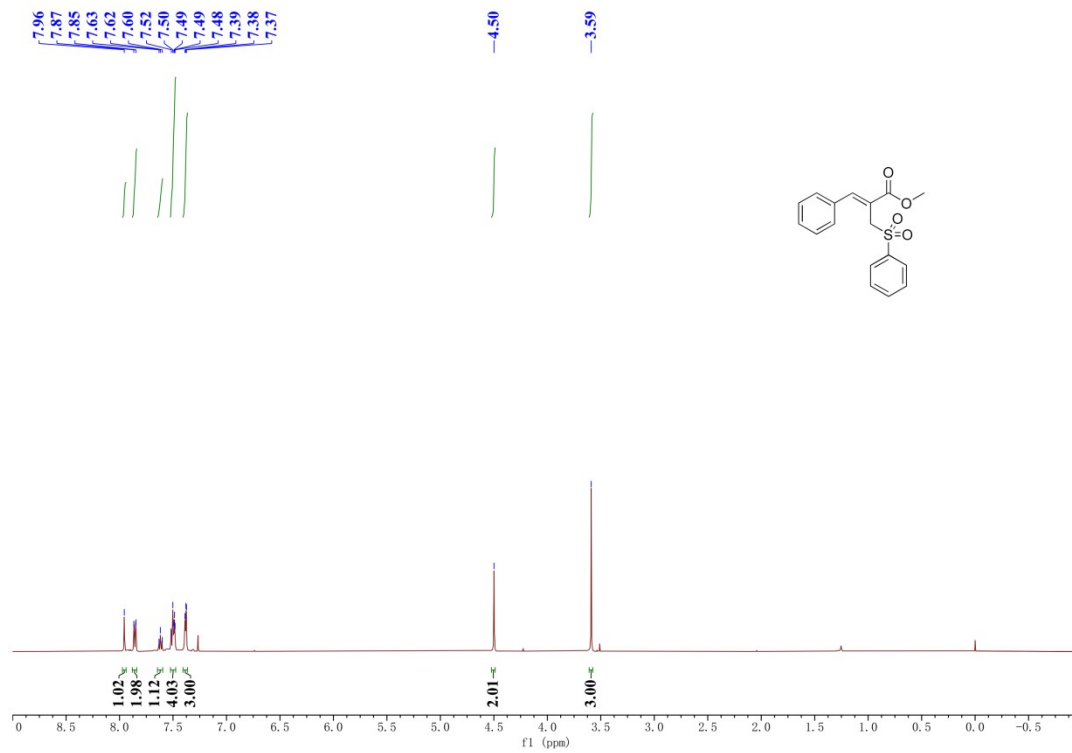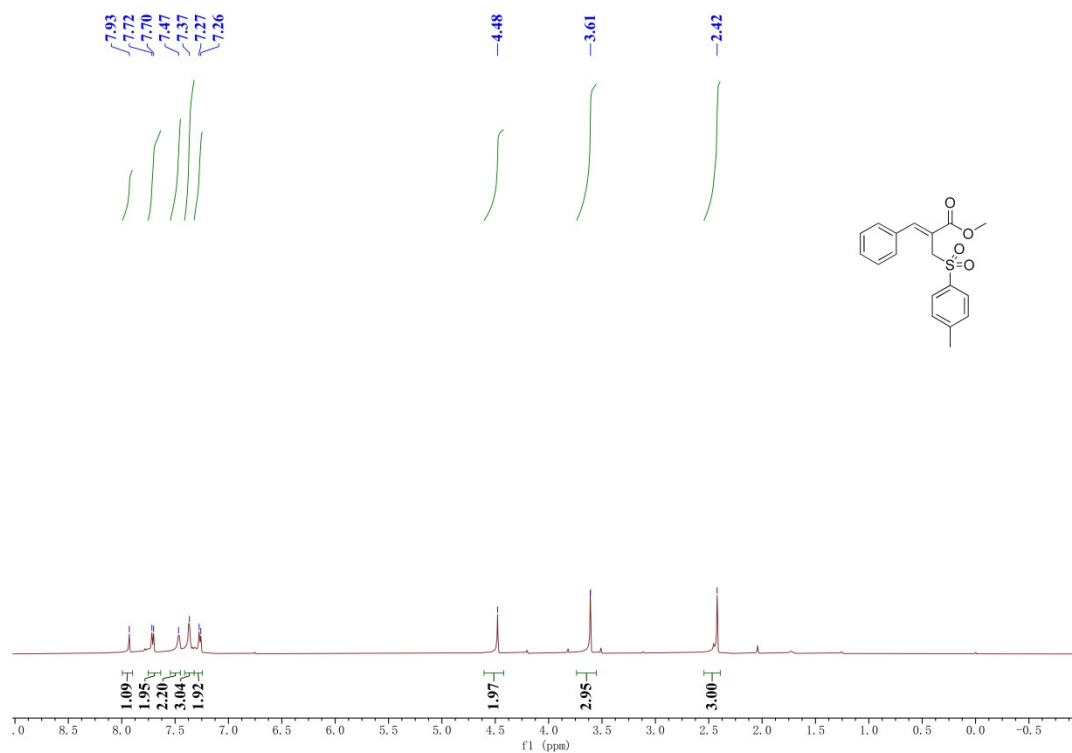

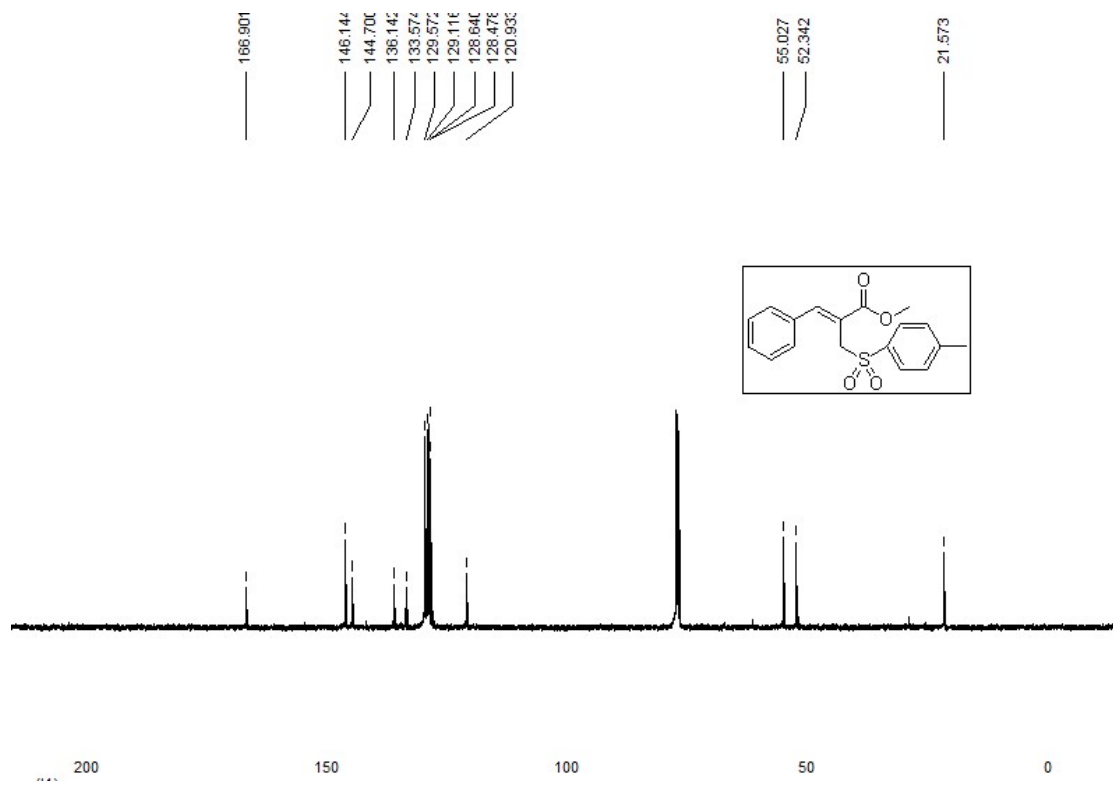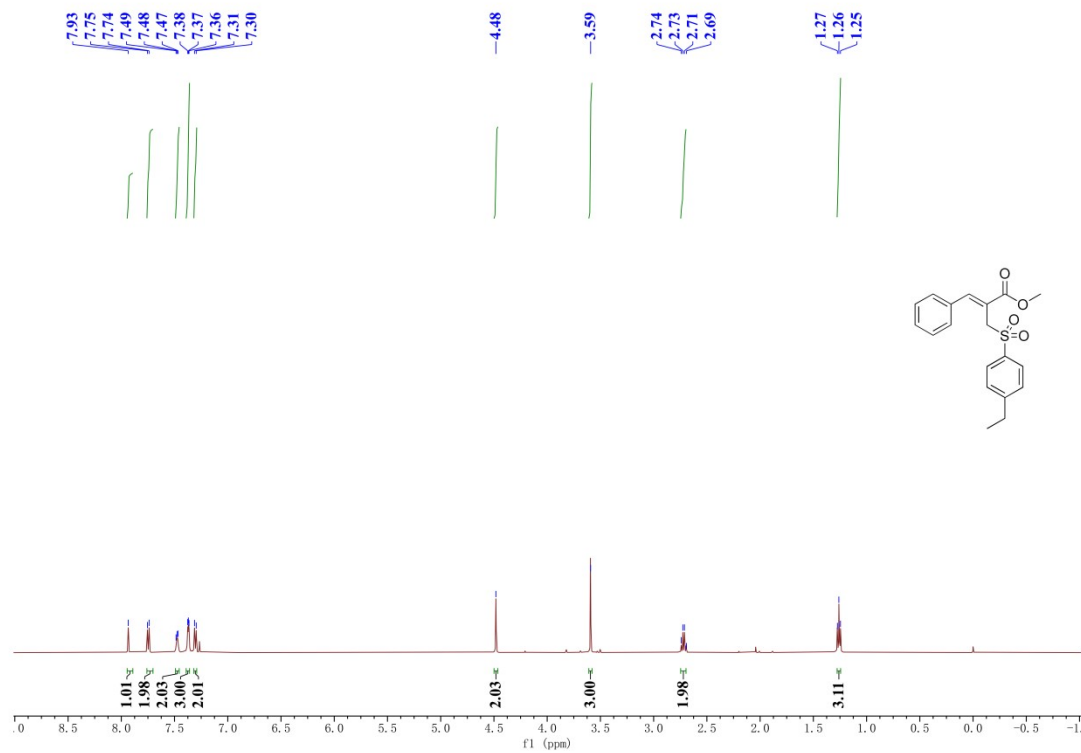



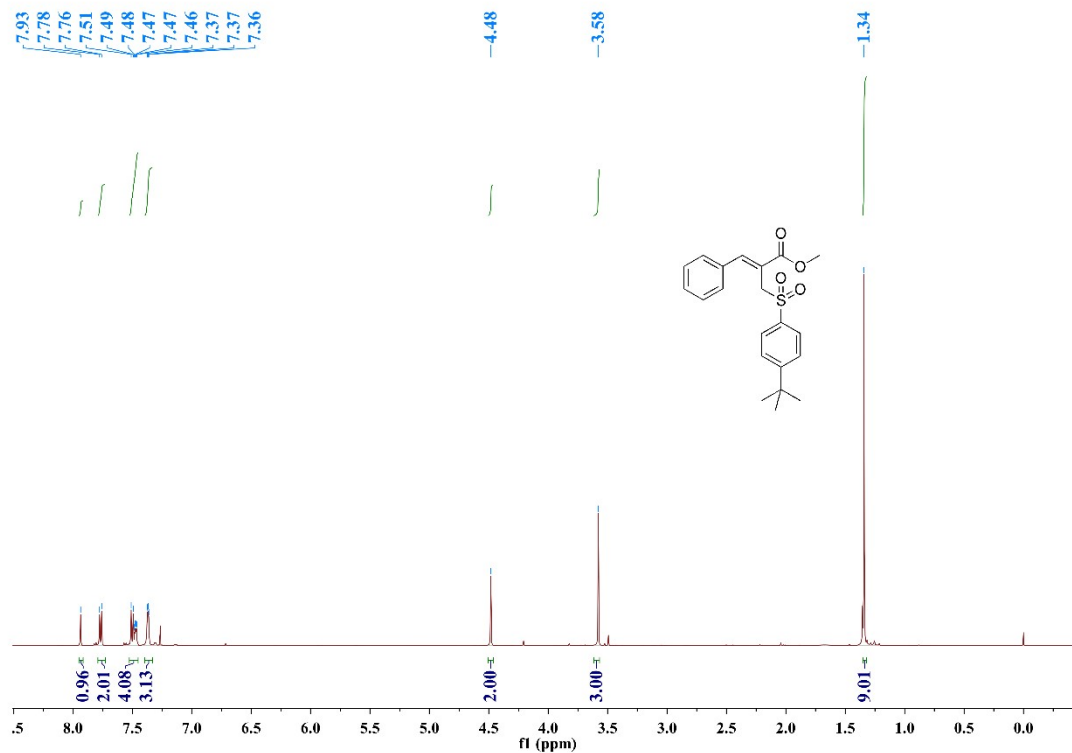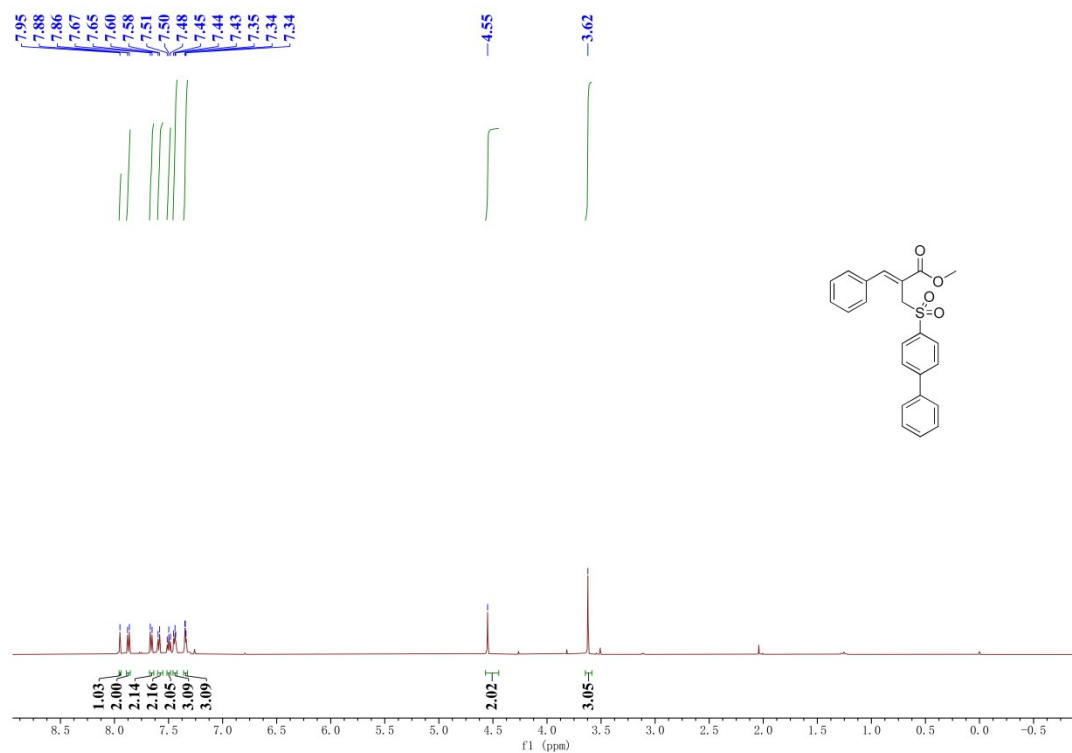

## 5. References

1. X. Yu, X. Li, and B. Wan, *Org.Biomol. Chem.*, 2012, **10**, 7479-7482.
2. J. Yu, X. Chang, R. Ma, Q. Zhou, M. Wei, X. Cao and X. Ma, *Eur. J. Org. Chem.*, 2020, **2020**, 7238-7242.
3. T. Chen, J. Lahbi, G. Broggini, A.Pradal and G. Poli, *Eur. J. Org. Chem.*, 2023, **26**, e202201493.
4. P. Xie, J. Wang, Y. Liu, J. Fan, X. Wo, W. Fu, Z. Sun and T.-P. Loh, *Nature Commun.*, 2018, **9**, 1321.
